# Influenza A viruses use multivalent sialic acid clusters for cell binding and receptor activation

Christian Sieben<sup>1,\*</sup>, Erdinc Sezgin<sup>2</sup>, Christian Eggeling<sup>2</sup>, Suliana Manley<sup>1,\*</sup>

1) Institute of Physics, École Polytechnique Fédérale de Lausanne (EPFL), Route Cantonale, 1015 Lausanne,

Switzerland

2) MRC Human Immunology Unit, University of Oxford, Weatherall Institute of Molecular Medicine, Headley Way,

OX3 9DS Oxford, United Kingdom

\*correspondence should be addressed to:

Suliana Manley

Associate Professor of Physics

EPFL-SB

CH-1015 Lausanne

Switzerland

+41 21 693 06 32

[suliana.manley@epfl.ch](mailto:suliana.manley@epfl.ch)

or

Christian Sieben

EPFL-SB

CH-1015 Lausanne

Switzerland

+41 21 693 06 32

[christian.sieben@epfl.ch](mailto:christian.sieben@epfl.ch)

**Short title:** Plasma membrane nanodomains facilitate influenza virus cell infection

**Keywords:** Influenza virus, super resolution, nanodomains, plasma membrane organization

## 32 **Abstract**

33 Influenza A virus (IAV) binds its host cell using the major viral surface protein hemagglutinin (HA).  
34 HA recognizes sialic acid, a plasma membrane glycan that functions as the specific primary  
35 attachment factor (AF). Since sialic acid alone cannot fulfill a signaling function, the virus needs to  
36 activate downstream factors to trigger endocytic uptake. Recently, the epidermal growth factor  
37 receptor (EGFR), a member of the receptor-tyrosine kinase family, was shown to be activated by and  
38 transmit IAV entry signals. However, how IAV engages and activates EGFR remains largely unclear.

39 We used multicolor super-resolution microscopy to study the lateral organization of both IAV  
40 attachment factors and its functional receptor at the scale of the IAV particle. Intriguingly,  
41 quantitative cluster analysis revealed that AF and EGFR are organized in partially overlapping  
42 submicrometer clusters in the apical plasma membrane of A549 cells. Within AF domains, which are  
43 distinct from microvilli, the local AF concentration, a parameter that directly influences virus-cell  
44 binding, reaches on average 10-fold the background concentration and tends to increase towards the  
45 cluster center, thereby representing a multivalent virus-binding platform. Using our experimentally  
46 measured cluster characteristics, we simulated virus diffusion on a membrane, revealing that the  
47 distinct mobility pattern of IAVs is dominated by the local AF concentration, consistent with live cell  
48 single-virus tracking data. In contrast to AF, EGFR resides in clusters of rather low molecular density.  
49 Virus binding activates EGFR, but interestingly, this process occurs without a major lateral EGFR  
50 redistribution, instead relying on activation of pre-formed clusters, which we show are long-lived.

51 Taken together, our results provide a quantitative understanding of the initial steps of  
52 influenza virus infection. Co-clustering of AF and EGFR permit a cooperative effect of binding and  
53 signaling at specific platforms, and thus we relate their spatial organization to their functional role  
54 during virus-cell binding and receptor activation.

55

56

57

## 58 **Author Summary**

59 The plasma membrane is the major interface between a cell and its environment. It is a complex and  
60 dynamic organelle that needs to protect as a barrier but also process subtle signals into and out of the  
61 cell. For IAV, an enveloped virus, it represents a major obstacle that it needs to overcome during  
62 infection as well as the site for the assembly of progeny virus particles. However, the organisation of  
63 the plasma membrane in particular the sites of virus interaction at the scale of an infecting particle  
64 (length scales < 100 nm) remains largely unknown.

65 Sialic acids serve as IAV attachment factors but are not able to transmit signals across the plasma  
66 membrane. Receptor tyrosine kinases were identified to be activated upon virus binding and serve as  
67 functional receptor. How IAV engages and activates its functional receptors still remains speculative.  
68 Here we use super resolution microscopy to study the lateral organization as well as the functional  
69 relationship of plasma membrane-bound molecules involved in IAV infection. We find that molecules  
70 are organized in submicrometer nanodomains and, in combination with virus diffusion simulations,  
71 present a mechanistic view for how IAV first engages with AFs in the plasma membrane to then  
72 engage and trigger entry-associated membrane receptors.

73

74

75

76

77

78

79

80

81

82

## 83 **Introduction**

84 Influenza A viruses (IAV) cause severe respiratory tract infections in humans often leading to  
85 seasonal local epidemics as well as periodic global pandemics [1]. During cell binding, IAV engages  
86 with low affinity attachment factors (AFs) as well as functional receptors to trigger cell entry by  
87 endocytosis. However, little is known about the lateral organization of both, AF and functional  
88 receptors, and how their organization translates into their functional role during virus infection.  
89 The viral factor responsible for IAV-cell contact, the first step of infection, is the envelope protein  
90 hemagglutinin (HA), a trimeric glycoprotein that covers ~ 90 % of the viral surface (Fig. 1A) [2]. The  
91 most common cellular AF for IAV is N-acetylneuraminic acid (also sialic acid), a highly abundant  
92 cell-surface glycan that within its glycosidic linkage can also encode IAV species specificity. Human-  
93 pathogenic IAV strains preferentially bind  $\alpha$ -2.6-linked sialic acid, while avian-pathogenic viruses  
94 prefer to bind  $\alpha$ -2.3-linked sialic acid. This specificity can be attributed to the topology of the glycan,  
95 which can more readily form contacts with receptor-binding domains of complementary HAs [3]. A  
96 common feature of glycan-protein interactions is their low affinity, which for HA- sialic acid lies in  
97 the millimolar range [4] and should make it challenging for the virus to form a stable interaction with  
98 cells. Although the glycan is highly abundant, which could lead to adhesion, single-virus tracking  
99 showed that the particles have some degree of freedom to explore the cell surface [5–7]. Indeed, it  
100 remains largely unclear how an initial low-affinity interaction, with particle mobility, can lead to a  
101 stable and specific virus-cell contact enabling a successful infection.

102         After binding, IAV enters cells by receptor-mediated endocytosis, where clathrin-mediated  
103 endocytosis was shown to constitute the major [7], albeit not the only entry route [8]. Since the role  
104 of sialic acid (SA) as the primary AF is only passive and it cannot trigger endocytosis, an active  
105 signal-processing receptor must also engage to allow viral entry. Recently, receptor-tyrosine kinases  
106 were shown to be able to fulfill this function [9]. Specifically, it was shown that, among other  
107 receptor-tyrosine kinases, epidermal growth factor receptor (EGFR) was activated during and  
108 necessary for IAV cell entry. However, how IAV finds and activates EGFR has remained speculative.

109 While molecular and structural information is available for both HA-SA [3] and EGFR-EGF  
110 interactions [10], much less is known about the spatial organization enabling EGFR activation during  
111 IAV cell infection.

112 Electron microscopy has provided a detailed picture of influenza viral particles [2] as well as  
113 its individual proteins [11]. However, imaging and quantitative analysis of cellular structures at the  
114 nanoscale remains challenging. Super-resolution microscopy represents an excellent tool to study the  
115 organization of cellular membranes at the scale of the viral particle (<100 nm) [12]. Here, we  
116 combined two complementary approaches, which together provide a versatile toolbox to study  
117 biological systems [12,13]. We used single molecule localization (SML) techniques known as  
118 stochastic optical reconstruction microscopy (STORM) and (fluorescence) photoactivated  
119 localization microscopy ((f)PALM) to image the organization of molecule in the cell membrane and  
120 track single molecules of EGFR [14–16]. We also applied stimulated emission depletion (STED) [17]  
121 to perform live-cell super-resolution microscopy.

122 We quantitatively analyzed the spatial organization of IAV AFs as well as EGFR on the  
123 surface of human alveolar epithelial cells. We found that AFs are organized in virus-sized clusters  
124 featuring a density gradient that decreases from the dense core to the periphery. Using these  
125 experimentally-determined characteristics, we investigated their role in virus-cell interactions and  
126 mobility with simulations. These simulations are in good agreement with virus tracking experiments,  
127 and together, they suggest that the spatial organization of AFs dominates virus-cell interaction during  
128 the early phase of virus infection. We further show that AF nanodomains overlap with EGFR clusters  
129 thereby enabling an AF-mediated EGFR activation. Interestingly, our results further suggest that pre-  
130 existing EGFR clusters are responsible for IAV-mediated receptor activation. We provide a novel  
131 view on the initial events of influenza virus infection and offer new insights into the functional role  
132 the spatial organization of cell surface AF and receptors.

133

134

## 135 **Results**

136

### 137 **Sialic-acid containing IAV attachment factors are organized in nanodomains on the plasma** 138 **membrane of A549 cells**

139 To examine the spatial organization of IAV AFs within the plasma membrane of permissive epithelial  
140 cells, we labeled them with fluorescently-modified lectins. Specifically, we used the plant lectin  
141 *Sambucus nigra* agglutinin (SNA), which selectively recognizes  $\alpha$ -2,6-linked sialic acid moieties.  
142 As this specific sialic acid linkage is preferably recognized by human-pathogenic IAV, such as  
143 H3N2/X31 [4] used here, we used SNA as a primary IAV AF label (please see also supplementary  
144 note 1). Using confocal microscopy, we found that SNA strongly labelled the plasma membrane of  
145 live A549 cells (Fig. 1B), showing enrichment in finger-like protrusions that morphologically  
146 appeared to be microvilli. We then used STED microscopy to more carefully study the smoother  
147 regions of the plasma membrane between the microvilli. On live A549 cells, we detected a strong  
148 heterogeneity of SNA cell surface labelling including small clusters at the scale of 100 - 200 nm (Fig.  
149 1C, right panel, inset).

150 Since small spherical H3N2/X31 virions have an average diameter of 120 nm [2], our next  
151 goal was to investigate the lateral organization of IAV AF at the scale of the virus-cell interface  
152 (radius < 60 nm). For this purpose, we imaged fixed A549 cells labelled with SNA conjugated to  
153 Alexa647 using STORM. STORM imaging confirmed our observations made with STED on live  
154 cells and revealed that SNA also labelled a variety of smaller structures that appeared on the flat parts  
155 of the plasma membrane (Fig. 1D). Such a heterogeneous plasma membrane carbohydrate  
156 distribution was also observed previously using Vero cells [18]. By labelling cells using antibodies  
157 against ezrin, an actin-binding protein that is highly enriched in microvilli [19], we confirmed that  
158 the larger structures are indeed microvilli (Fig. S2A). Microvilli, due to their narrow size, are not  
159 actively involved in endocytosis [20,21]; thus, we focused our quantitative analysis on the smaller  
160 AF cluster population.

161

## 162 **Quantitative analysis of SNA nanodomains**

163 To describe the lateral arrangement of AF from our STORM data, we analyzed the distribution of  
164 localizations using an algorithm based on the detection of local density differences. To this end, we  
165 developed a cluster analysis routine (see *Methods*) that allowed us to extract geometrical properties  
166 of the clusters as well as an estimate of the number of AF molecules (Fig. 2). To identify and threshold  
167 the large microvilli cluster population, we first performed cluster identification on the ezrin  
168 localization maps (Fig. S2B). We found that the large ezrin clusters had dimensions of 10 - 50 nm  
169 across the short and 0.5 - 2  $\mu\text{m}$  along the long axis (Fig. S2A). These parameters were then used to  
170 filter out the large cluster population corresponding to microvilli identified in AF localization maps.  
171 After filtering, we identified a heterogeneous population of small clusters with an average area of  
172  $0.016 \mu\text{m}^2$  (Fig. 2C). Since the cluster area was found to be at the same scale as the projected two-  
173 dimensional area of a spherical IAV ( $0.0079 \mu\text{m}^2$  for  $r = 50 \text{ nm}$ ), we took a closer look at the  
174 localization density within each individual cluster. For each localization, we identified the number of  
175 nearest neighbor localizations within a distance of three times the localization precision ( $3\sigma \sim 30 \text{ nm}$ )  
176 (Fig. S3). Interestingly, we found that AF clusters have an average 10-fold enrichment compared to  
177 the local background while some reach an even up to 20-fold increase in receptor density (Fig. 3).  
178 Using simulated AF domains, we observed that this local concentration effect can be partly mimicked  
179 by the localization precision (Fig. S4). However, in our experimental case this accounts only for an  
180 enrichment of  $< 8$ -fold (Fig. S4D).

181

## 182 **IAV performs a receptor concentration-driven random walk on the plasma membrane**

183 Our information on AF clustering led us to wonder how the overall IAV motion on the cell membrane  
184 would be affected by the heterogeneous local AF concentration. We established a simple diffusion  
185 model to simulate the behavior of individual viruses on the cell surface. The model assumes a two-  
186 dimensional random walk [22] where the virus undergoes periods of free diffusion (with diffusion

187 coefficient  $D_{free}$ ) until it encounters a region of high AF concentration and becomes confined (with  
188 diffusion coefficient  $D_{conf}$ ). The time a simulated particle stays confined will depend on  $D_{conf}$  as well  
189 as on the size of the confined region (i.e. the AF cluster size as measured using STORM). To identify  
190 and quantify confined regions, we establish a confinement index  $I_{conf}$  denoting the probability for the  
191 particle to be confined at time  $t$  [23]. Even simulations of purely free diffusion will display periods  
192 of apparent confinement, due to the stochastic nature of thermal motion. We define a threshold level  
193 of confinement to exclude these random fluctuations,  $I_{thresh} = 15$ , which allows identification of  
194 confined areas and comparison of the confinement dwell time (Fig. 4 A, D). Our simulations reveal  
195 a characteristic  $I_{conf}$  signature of free (Fig. 4D) as well as confined diffusion (Fig. 4B and E and  
196 supplementary movie 1). In simulations of purely free diffusion, the confinement index does not rise  
197 above  $I_{thresh}$ , which is in contrast to the case after including confinement zones (Fig. 4E).

198 To test whether our model is consistent with the behavior of IAV on the plasma membrane of  
199 living cells, we performed single-virus tracking on A549 cells. To this end, IAV was labeled with the  
200 lipid fluorophore DiD as described in *Methods*. Labelled viruses were diluted in infection medium  
201 (DMEM, 0.2% BSA) to a final concentration of 20  $\mu\text{g}/\text{ml}$  (protein content) and viral aggregates were  
202 removed using a 0.2  $\mu\text{m}$  sterile filter. We performed virus tracking at physiological conditions (37  
203  $^{\circ}\text{C}$ ) as well as conditions that suppress virus endocytosis (4  $^{\circ}\text{C}$ , dynasore treatment) to prolong the  
204 particles' residence time on the cell surface. During trajectory analysis, we observed different modes  
205 of movement, which we classified into four types: (1) confined, (2) ballistic, (3) drifting and (4) mixed  
206 (Fig. S5). The ballistic movement is directional, and goes up to speeds of 1-2  $\mu\text{m}/\text{sec}$ ; thus, we  
207 assigned it to microtubule-associated transport as previously described [6,7]. Since this type of  
208 movement follows a successful virus internalization, we expected to see it decrease in frequency after  
209 blocking endocytosis. Indeed, the fraction of ballistic trajectories dropped from 30% to below 5%  
210 when we imaged at low temperature or in the presence of 40  $\mu\text{M}$  dynasore, a dynamin and thus  
211 clathrin-mediated endocytosis inhibitor [24]. Interestingly, we observed a marked increase of the  
212 other three motion classes, supporting the idea that they take place at the plasma membrane (Fig. S5).



213 When we took a closer look at the mixed class of trajectories, we found regions of extended IAV  
214 residence time indicating spatial confinement alternating with free diffusion (Fig. 4C). Consequently,  
215 we applied our confinement analysis to the mixed IAV trajectory class. Interestingly, our trajectory  
216 analysis could detect pronounced areas of confinement that indeed alternate with regions of free  
217 diffusion (Fig. 4F). Hence, our data is consistent with our model of an AF concentration-driven cell  
218 surface motion.

219 If AF islands of different lateral concentrations coexist in the plasma membrane, as observed  
220 using STORM, these regions could serve as binding platforms for diffusing viruses. According to our  
221 simple diffusion model, we assume that the local AF concentration dominates  $D_{conf}$  (see *Methods*),  
222 which in turn determines the particles dwell time inside the confined regions. Hence, to test if  $D_{conf}$   
223 correlates with the dwell time, we performed a sub-trajectory analysis on experimental trajectories,  
224 where each trajectory was screened for temporal confinement according to  $I_{conf}$ . For each confined  
225 region, we then identify the dwell time as well as  $D_{conf}$  (see *Methods*). We observed indeed that the  
226 dwell time is negatively proportional to  $D_{conf}$  as predicted by our diffusion model (Fig. 4H).  
227 Subtrajectory analysis further allowed us to estimate the spatial dimensions of the confined regions  
228 (Fig. 4G). We found an average radius of 104 nm corresponding to a median area of  $5.7 \cdot 10^4 \text{ nm}^2$ ,  
229 which is only slightly larger than the cluster size found using STORM (Fig. 2D). Together, we link  
230 the lateral organization of AFs, characterized using STORM, with live-cell IAV tracking data. The  
231 structural information served as an input for a diffusion model, whose predictions are consistent with  
232 dynamic single IAV plasma membrane motion. Our results suggest that IAV-cell binding and its  
233 dynamic surface movement are dominated by the local AF concentration.

### 234 235 **EGFR is organized in nanoclusters that overlap with SNA domains**

236 Since sialic acid cannot transmit a signal into the cell and thus only serves as an AF for the virus, we  
237 wondered about its organization relative to that of the functional receptor EGFR. We investigated the  
238 lateral organization of EGFR in A549 cells using fluorescently labelled anti-EGFR antibodies. In our

239 infection experiments, the cells were pre-incubated in serum-free infection medium (30 min) before  
240 viruses were added, a common procedure for influenza virus infection. To reproduce these  
241 conditions, we also performed a serum-free pre-incubation before the cells were fixed and  
242 immunolabelled for EGFR.

243 Using STORM imaging, we found that EGFR is present at much lower concentration on the  
244 cell surface compared to SA-conjugated AF, but, interestingly, also localized in nanodomains (Fig.  
245 5A). Due to the sparsity of EGFR labeling, which might lead to false detection of protein clusters due  
246 to fluorophore blinking [25], we established an adapted analysis scheme based on the photophysical  
247 characterization of the fluorescent probe used in our experiments. As shown in Fig. S6, by imaging  
248 sparsely spread isolated molecules, we first measure the dark time  $t_D$  as well as the spread of  
249 localizations originating from a single molecule  $\Delta(x,y)$  (i.e the localization precision  $\sigma$ ). Both  
250 parameters can then be used to correct the localization maps for blinking and allow a more accurate  
251 cluster identification as well as estimation of the number of molecules (Fig. S6).

252 After blink correction and cluster identification, we found that in the absence of EGF  
253 stimulation between 30 - 60 % of the EGFR molecules reside in clusters. The clusters have an average  
254 diameter of 29 nm and are composed of on average 6 molecules (Fig. 5B), which is in agreement with  
255 previous studies using electron microscopy [26] and FRET [27]. Since IAV directly binds to sialic  
256 acid on the cell surface, one way to facilitate IAV-EGFR interactions would be for EGFR and AF to  
257 occupy the same regions on the plasma membrane. To test this hypothesis, we performed two-color  
258 STORM imaging (Fig. 5C) using A549 cells co-labeled for AF (with SNA) and EGFR. Indeed, we  
259 found that EGFR clusters overlap with SNA-labeled membrane domains. However, since sialic acid  
260 AFs are much more abundant than EGFR, their colocalization could occur simply by chance. To  
261 examine this possibility, we performed a quantification based on coordinate-based colocalization  
262 (CBC) [28]. CBC analysis provides an estimate for the spatial correlation of two localization datasets,  
263 reflected in the colocalization parameter  $C_A$ . To get a better indication about the extent of  
264 colocalization in our SNA/EGFR dataset, we added two controls to our analysis. We performed an

265 experimental positive control by using the lectin SNA conjugated with two different fluorophores  
266 (denoted SNA/SNA). As a negative control and to take the difference of localization density into  
267 account, for each two-color field of view in SNA/EGFR, we simulated a random dataset at the same  
268 density as the EGFR dataset (denoted SNA/random). Finally, we counted localizations with  $C_{A>0.3}$   
269 as colocalized (Fig. S7). As shown in Fig. 5D, the negative control SNA/random reaches with  $C_{A>0.3}$   
270 = 0.035 the lowest level of colocalization only accounting for random colocalization, while the  
271 experimental positive control SNA/SNA reaches the highest score of  $C_{A>0.3} = 0.27$ . CBC analysis of  
272 SNA/EGFR colocalization reached  $C_{A>0.3} = 0.17$ , suggesting that EGFR and SNA do not randomly  
273 colocalize, but indeed share the same membrane compartments.

274 If an infecting IAV encounters an EGFR cluster following attachment to sialic acid AFs, we  
275 would expect EGFR activation upon IAV adsorption. Next, we wanted to test whether the cell's  
276 EGFR pool responds to stimulation using an antibody that recognizes a phosphorylated tyrosine  
277 (Y1068, pEGFR) previously shown to be involved in IAV-induced EGFR activation [9].  
278 Interestingly, we found a fraction of pEGFR nanodomains even under unstimulated conditions.  
279 However, following stimulation with both, EGF or IAV, we observed an increased number of pEGFR  
280 clusters per area on the plasma membrane (Fig. 5E). Notably, in order to keep the signal at the plasma  
281 membrane, endocytosis was slowed down by stimulating the cells on ice.

282 In order to better understand how IAV binding leads to EGFR activation, we took a closer  
283 look at the properties of individual EGFR clusters. It was previously hypothesized that IAV binding  
284 leads to a local concentration of EGFR proteins in plasma membrane clusters eventually leading to  
285 signal activation [9], an effect that was also observed before in BHK cells upon EGF stimulation [29].  
286 To test this hypothesis, we labeled unstimulated as well as IAV-adsorbed cells using anti-EGFR  
287 antibodies. After EGF stimulation, we observed a decrease in the clustered molecule population as  
288 well as the number of clusters per area (both by on average 20%) (Fig. 5F). Surprisingly, we did not  
289 find evidence for a significant redistribution of EGFR after IAV-cell binding (Fig. 5F). In addition,  
290 we could not detect an effect on the cluster size or the number of molecules in a cluster (Fig. S8).

291

## 292 **EGFR forms long-lived nanodomains in living cells**

293 Our results indicate that pre-formed receptor clusters might be involved in IAV-induced EGFR  
294 activation. While such a mechanism was previously hypothesized [30], it was never shown that  
295 receptor clusters can reach lifetimes in the plasma membrane that would allow this type of activation.  
296 To estimate the lifetime of EGFR clusters, we turned to live-cell microscopy experiments using A549  
297 cells expressing EGFR tagged with the photo-convertible protein mEos3 [31]. We used an EGFR  
298 variant that was previously shown to be fully functional in a mammalian cell expression system [32].  
299 Photoactivation of only a small subset of EGFR-mEos3.2 molecules allowed us to localize individual  
300 molecules which can then be tracked over consecutive frames, and renewed by further  
301 photoactivation (single-particle tracking, sptPALM) [33]. We performed sptPALM on the apical as  
302 well as the basolateral plasma membrane of live A549 cells in the absence of EGF, resulting in high-  
303 density protein diffusion mapping (Fig. 6). Calculation of the mean-squared displacement (MSD) as  
304 a function of the lag time  $\Delta t$  allowed us to determine the instantaneous diffusion coefficient  $D$  along  
305 the trajectory. We found a broad range of diffusion coefficients ranging between 1 and  $10^{-3} \mu\text{m}^2/\text{sec}$   
306 (Fig. S9), indicating that mobile and immobile protein fractions coexist in the plasma membrane.  
307 Indeed, after classifying trajectories based on their diffusion coefficient  $D$ , MSD vs.  $\Delta t$  plots revealed  
308 a rather linear relationship for trajectories with  $D > 0.05 \mu\text{m}^2/\text{sec}$ , while for trajectories with  $D < 0.05$   
309  $\mu\text{m}^2/\text{sec}$  the curve approached a maximum at large  $\Delta t$  values (Fig. S9). This characteristic time  
310 dependence of the MSD vs.  $\Delta t$  curve also indicates mobile free diffusing proteins co-existing with  
311 immobile or confined-diffusing EGFR proteins in the plasma membrane.

312 The same data was then used to construct a map of all detected localizations, which revealed  
313 a non-homogeneous distribution, with proteins appearing clustered in nanodomains (Fig.6A). Using  
314 our custom cluster identification (as in Fig. 2), we found EGFR clusters with a diameter ranging  
315 between 30 and 300 nm, thereby confirming the clustered organization of EGFR in living cells as  
316 seen after cell fixation using STORM. In addition, because the cells were alive, we could use the

317 time-resolved single molecule detection to quantify the temporal stability of EGFR clusters (Fig. 6B).  
318 Such an approach was used previously to quantify polymerase 2 clustering in live cells and is referred  
319 to as time-correlated PALM (tcPALM) [34]. We selected only regions identified using density-based  
320 clustering to perform cumulative localization counting (Fig. 6B, C). We obtained a distribution of  
321 EGFR cluster lifetimes with an average of 140 seconds (Fig. 6D, apical). Notably, this lifetime only  
322 provides a lower estimate since the cluster might have existed before starting the acquisition and  
323 might also be present after the last cluster molecule is bleached.

324

## 325 **Discussion**

326 Understanding the initial phase of virus infection is crucial for the development of effective  
327 countermeasures such as adhesion inhibitors that catch viral particles before they can engage in the  
328 first virus-cell contact [35,36]. After successful binding of SA-containing AF on the cell surface, the  
329 virus has to find its functional receptor to enter and infect its target cell. While these two steps are  
330 crucial for IAV infection, it remained largely speculative how the virus finds a way to efficiently bind  
331 a cell and engage with a functional receptor. Our results provide a quantitative structural view of the  
332 lateral organization of virus AF and receptors while suggesting a functional link between cell binding  
333 and receptor activation. Several studies have tracked fluorescently-labeled IAV on and inside  
334 respective target cells [5–7]. It was found that IAV particles after forming the initial cell contact move  
335 in an actin-dependent way for on average 6 min before endocytosis [6]. In a later study, using  
336 multicolor imaging of virus and clathrin, this period was assigned to be important for the induction  
337 of clathrin-mediated endocytosis [7]. However, how these processes are linked and what are the  
338 structural determinants remained unclear.

339 We used super-resolution microscopy to investigate the structural organization of AF as well as one  
340 functional receptor - EGFR - at the scale of the infecting virus. We show that SA-conjugated AFs are  
341 organized in a heterogeneous population of differently sized nanodomains. We find that one labeled  
342 structure can be assigned to microvilli, a dominant topological feature of the apical cell surface in

343 epithelial cells and further focused our attention on the non-microvilli cluster population found on the  
344 flat and endocytosis-active regions of the plasma membrane. Here we found smaller nanodomains  
345 ranging in diameter from about 50 - 300 nm. Interestingly, when we looked at the local localization  
346 density per cluster, we found that the clusters differ in their molecular density where some show an  
347 up to 20-fold increase in molecule concentration towards the cluster center. To test if the grouping of  
348 AF in dense clusters is advantageous for virus binding, we constructed a simple binding simulation  
349 (Fig. S10). In one part of the simulation, we gradually shift AF molecules from a random position  
350 into a clustered organization, while the total number of molecules stays constant. In a second  
351 approach, we simulate a stable population of clusters within a background of free individual  
352 molecules and vary the number of molecules per cluster. In both cases, we simulate a spherical virus  
353 particle and project its size as a landing spot on the simulated molecule surface. Successful binding  
354 is counted if the virus can at least bind 10 molecules. As shown in Fig. S10, we find a strong positive  
355 correlation between clustering and receptor binding clearly indicating that nanoclustering enhances  
356 the probability of efficient virus binding. In addition, as it was also suggested before for DC-SIGN  
357 [37], this heterogeneous cluster organization might also broaden the binding capability of the cell  
358 surface and effectively provide the virus particle with a range of binding times to explore the cell  
359 surface. We hypothesize this behavior and simulate viral movement based on the availability of AF  
360 resulting in a predicted random walk motion that is intercepted by temporal confinement due to local  
361 AF enrichment. We went on to test if this behavior can be observed experimentally. Our single-virus  
362 tracking experiments showed four major types of movement. While fast directed transport was shown  
363 to be microtubule-associated inside the cells [6], slow drifts, confinement and diffusive motions are  
364 characteristic for plasma membrane movement [38]. Indeed, when we used conditions of hindered  
365 endocytosis (i.e low temperature or dynamin inhibition), we detected an increase in the slow and  
366 almost complete disappearance of the fast trajectory types. Interestingly, we also found that the dwell  
367 time in confined areas during diffusive motions correlates with the confinement diffusion coefficient  
368  $D_{conf}$ . This follows our simulation confirming our basic hypothesis that virus plasma membrane

369 motion is dominated by the surface concentration of available AFs. We provide a functional link  
370 between the clustered organization of virus AF and their role for virus-cell binding.

371 Having formed a stable interaction with its host cell, IAV enters the cell by endocytosis. EGFR and  
372 other receptor tyrosine kinases were shown to be activated during and promote IAV-cell entry [9]. It  
373 was suggested that IAV binding leads to EGFR clustering and the formation of an active signaling  
374 platform [9]. We found that also under unstimulated conditions, EGFR is mainly (up to 60 %)   
375 localized in small nanodomains with a mean diameter of 29 nm containing on average 6 molecules.

376 In the canonical activation model, EGFR binds its substrate EGF, undergoes dimerization and  
377 subsequent autophosphorylation, thereby inducing a variety of signaling cascades [39]. However, an  
378 additional level of higher oligomeric EGFR clusters has been shown across different cell types. Their  
379 reported diameter ranges from 50 nm [29] over 100 - 300 nm [26,30,40] up to near micrometer sizes  
380 [41], with molecule numbers between <10 [42] up to thousands [41]. Clustering and cluster activation  
381 of EGFR was suggested to facilitate receptor activation which might play a role in tumor development  
382 [30]. Further, the EGFR cluster size was shown to respond to activation [29] suggesting a lateral  
383 molecule redistribution. Upon binding of EGF or IAV, we probed the cells with antibodies  
384 specifically detecting the autophosphorylation site Y1068, shown to be involved in IAV-mediated  
385 EGFR activation [9]. We found an increased signal at the plasma membrane which, when imaged in  
386 STORM, was found concentrated in nanodomains. Interestingly, the tetrameric SNA could not  
387 activate EGFR suggesting that IAVs higher multivalency is needed for efficient receptor activation  
388 (Fig. S11). At this point, we hypothesized two scenarios in which, during activation, EGFR either (1)  
389 assembles into activated clusters or (2) pre-existing clusters become activated. Hence, we tested the  
390 organization of EGFR under stimulated conditions. While we observed a reduction of the clustered  
391 molecule fraction as well as the number of clusters per area upon EGF stimulation, an effect that was  
392 observed previously for Erb2 [43], we could not detect a major redistribution in response to IAV  
393 attachment. Also, using STORM, we could not detect a change in cluster size and molecule  
394 composition following either stimulation (Fig. S8). We conclude that intercluster spatial

395 rearrangements below our resolution eventually lead to cluster activation. Methods that are more  
396 sensitive to protein-protein distances below 20 nm such as FRET could be used to test this hypothesis.  
397 Then to test if EGFR clusters exist long enough to allow their activation, we conducted live-cell  
398 sptPALM. Our PALM imaging could confirm the existence of nanodomains within the plasma  
399 membrane of unstimulated cells. Consequently, we performed spatial clustering to find zones of  
400 EGFR enrichment and measure their lifetime. We found that the lifetime of EGFR nanodomains in  
401 both, the apical as well as the basolateral membrane went up to 2 to 4 minutes. While such a long  
402 cluster lifetime allows activation of pre-existing clusters, this observation raises the question for the  
403 stabilization of EGFR clusters. Hence, we tested the stability of EGFR clusters upon treatment with  
404 classical membrane domain-destabilizing conditions such as actin depolymerization (latrunculin A)  
405 and cholesterol extraction (methyl- $\beta$ -cyclodextrin). As also observed before [29,30], our results  
406 suggest cluster destabilization following both perturbations (Fig. S11B) indicated by an increased  
407 fraction of unclustered EGFR molecules. Interestingly, we found a stronger effect after cholesterol  
408 depletion, a condition that was previously shown to attenuate IAV replication [9]. Very long receptor  
409 cluster lifetimes were observed previously for class I major histocompatibility complex (MHC)  
410 molecules, that form actin-stabilized domains [44,45]. However, one can speculate about the function  
411 of membrane receptor clusters [46]. It can be excitatory as shown for T-cell receptor [47] and linker  
412 for activation of T-cell (Lat) [48,49] as well as LFA-1 [50] or CD36 [51]. These nanodomains render  
413 the cell highly sensitive to small amounts of signaling molecules and due to the high local receptor  
414 concentration allow a fast signaling response [39]. Such a function seems likely for EGFR clusters  
415 involved in IAV cell entry observed in our study. But their function can also be inhibitory as shown  
416 for the B-cell receptor [52] or its negative co-receptor CD22 [53]. Receptor nanodomains could even  
417 engage in modulating the signaling output. As EGFR sits at the top of a broad array of signaling  
418 cascades, an asymmetric distribution of receptors could enable cells to rapidly respond and process  
419 different stimuli [39].

420



421 In summary (see Fig. 7), our results show the compartmentalization of the cellular plasma membrane  
422 in A549 cells. We found that both of the primary IAV-binding molecules, the AF sialic acid as well  
423 as the functional receptor EGFR, are organized in nanodomains. We further build a functional link  
424 between the lateral membrane organization and its impact on virus infection. While AFs forms dense  
425 clusters, it provides a multivalent binding platform allowing stable virus attachment. The diversity of  
426 those clusters (i.e. their size and molecule concentration) results in a spectrum of binding times. In  
427 our case, we observed dwell times between 5 - 20 sec for mixed diffusive motion or much longer  
428 (several minutes) if we include confined trajectories. Since EGFR clusters overlap with SA-enriched  
429 areas, IAV can indeed reach a functional receptor, while diffusing between AF islands (Fig. 7).  
430 Finally, our results suggest that pre-existing EGFR clusters become activated during virus binding.  
431 Quantitative super-resolution microscopy has provided a versatile toolbox to study the lateral  
432 organization of the plasma membrane to understand its structure-function relationship. Our study  
433 provides a first example for how membrane compartmentalization can engage in and modulate IAV  
434 cell binding and receptor activation.

435

436

437

438

439

440

441

442

443

444

445

## 446 **Materials and Methods**

447

### 448 **Ethics statement**

449

450 Work with embryonated chicken eggs was conducted in the lab of Prof. Andreas Herrmann (Institute  
451 for Biology, Humboldt-Universität zu Berlin, Germany) in accordance with European regulations and  
452 approved by the Berlin state authority, Landesamt für Gesundheit und Soziales. Influenza A (H3N2)  
453 X-31 was propagated in the allantoic cavities of 10-day old embryonated chicken eggs (Lohmann  
454 Tierzucht GmbH, Germany) as described previously [54].

455

### 456 **Cells and Viruses**

457

458 A549 cells (ATCC CCL-185) were kindly provided by Dr. Thorsten Wolff (Robert-Koch Institute Berlin,  
459 Germany). A549 cells were cultured in Dulbeccos Modified Eagles Medium (DMEM), supplemented with 10  
460 % fetal calf serum (FCS). The cells were passaged every 3-4 days. One day prior to the experiment, the cells  
461 were detached from the cell culture flask using 0.5 % Trypsin/EDTA for about 10 min. The cells were diluted  
462 in fresh DMEM and  $3 \times 10^5$  cells were seeded on fibronectin-coated 25 mm round glass slides (Menzel, # 1.5).  
463 Influenza A (H3N2) X-31 was propagated in the allantoic cavities of 10-day old chicken eggs (Lohmann  
464 Tierzucht GmbH, Germany) as described previously [54]. Purified viruses were stored at -80 °C. Virus aliquots  
465 were thawed on the day of the experiment and kept on ice until further use. All chemicals if not otherwise  
466 stated were purchased from Sigma-Aldrich. Cell culture media were purchased from Life Technologies.

467

### 468 **A549 cell infection**

469

470 One day prior to the experiment,  $3 \times 10^5$  cells were seeded on fibronectin-coated 25 mm round glass slides. For  
471 infection experiments (Fig. S1), the cells were either incubated in serum-free medium for 30 min (control) or  
472 in DMEM supplemented with 100 ng/ml human EGF (R&D Systems) for 90 min to remove EGFR from the  
473 cell surface. Cells were infected with IAV X-31 (MOI ~1) in infection medium (DMEM, 0.2 % bovine serum

474 albumine (BSA)) for 30 min before the medium was changed and the cells were further incubated for 5 h in  
475 infection medium. The cells were washed in pre-warmed PBS and fixed in freshly prepared 4 % PFA (Alpha  
476 Aesar) for 10 min at room temperature. After a 25 min fixation/blocking step in PBS supplemented with 0.2  
477 % Triton X-100 and 0.2 % BSA , the cells were incubated with the primary antibody (anti influenza  
478 nucleoprotein (NP), Millipore) for 1 h. The cells were washed three times 10 min in PBS before further  
479 incubated with secondary antibodies (goat anti-mouse, Alexa 555 conjugate, Life Technologies) for 1 h.  
480 Finally, the cells were washed in PBS, stained with DAPI (0,2 µg/ml in PBS for 10 min) and mounted on  
481 standard microscope slides with Mowiol (Carl Roth). The slides where imaged using a Zeiss Axioplan  
482 epifluorescence microscope. Ten overview images (20 x magnification) were acquired for each condition and  
483 nuclear NP signal was quantified using Cellprofiler[55].

#### 484 **Single-virus tracking**

485

486 IAV H3N2/X-31 were incubated with 50 µM of the lipid dye DiD (Life Technologies) for 2 h at RT. To remove  
487 the free dye, viruses were either pelleted (50.000 g for 5 min) or purified using a NAP5 size exclusion column  
488 (GE Healthcare). Immediately before the experiment, virus aggregates were removed using a 0.2 µm pore size  
489 filter. Labeled viruses were added to A549 cells grown in 35 mm poly-L-lysine coated glass bottom petri  
490 dishes (MatTek Corp.) and allowed to attach on ice for 10 min. The cells were washed with PBS and overlaid  
491 with 2 ml pre-warmed, serum and phenol red-free DMEM supplemented with 100 mM Hepes. Unless  
492 otherwise stated, the cells were kept either at 4 or 37 deg throughout the experiment. For the perturbation  
493 experiments, the cells were pre-incubated in DMEM supplemented with 50 µM nocodazole (Sigma) or 40 µM  
494 dynasore (Sigma) for 30 min. The drugs were kept present throughout the experiment. Low temperature  
495 incubation was achieved using a custom build microscope temperature chamber. DiD was excited with 633  
496 nm laser light, which was reflected on the sample by a 488/633 nm dichroic mirror. Emission light was  
497 collected using a 60x PlanApo VC oil-immersion objective (Nikon) and imaged onto an EMCCD camera  
498 (Andor iXon, Andor Technology). Images were recorded at 2 frames per second for 10 min. Image stacks were  
499 processed and the trajectories were build using ParticleTracker for ImageJ [56]. The trajectories were further  
500 analyzed using custom MatLab (Mathworks) scripts. To identify and characterize temporal particle  
501 confinement, we used the method developed by Simson *et al.* [23] implemented into our custom analysis  
502 pipeline. Briefly, the algorithm takes a segment of the trajectory and determines if the particle moved according

503 to a given free diffusion coefficient ( $D_{\text{free}}$ ) within the segment, i.e. if the particles stays in a predicted region.  
504 This is translated into a confinement probability/index  $I_{\text{conf}}$ . Since the identification depends on the length of  
505 the segment  $S$  [23], we optimized  $S$  using simulated trajectories resulting in  $S = 5$  s for our analysis.

506

### 507 **Trajectory analysis and single particle tracking simulations**

508

509 Random brownian particle trajectories were generated using the script package *msdalyzer* [57] incorporated  
510 into a custom MatLab routine. Single virus trajectories were analyzed as described above. Trajectory and sub-  
511 trajectory analysis was performed using *msdalyzer* to retrieve diffusion coefficients from mean square  
512 displacement (MSD,  $\langle r^2 \rangle$ ) vs. lag-time ( $\Delta t$ ) plots. MSD vs. lag-time plots were fitted according to the type of  
513 motional behavior, which was either free diffusion ( $\langle r^2 \rangle = 4D_{\text{free}}\Delta t$ ) or, for sub-trajectory analysis, confined  
514 (sub)diffusion ( $\langle r^2 \rangle = \langle r^2 \rangle (1 - A_1 \exp(-4A_2 D_{\text{conf}} \Delta t / \langle r^2 \rangle))$ ). We found for IAV a mean free diffusion coefficient  
515  $D_{\text{free}} = 0.041 \mu\text{m}^2/\text{s}$ .

516 Using  $D_{\text{free}}$  as well as a time step ( $\Delta t = 0.5$  s), the displacement of a freely diffusing particle follows a Gaussian  
517 distribution with standard deviation given by  $\sigma = \text{sqrt}(4D_{\text{free}}\Delta t)$ . Temporal confinement was introduced by  
518 generating a sub-trajectory using  $D_{\text{conf}}$ . For the dwell time simulation, we generated random trajectories that  
519 run into a confinement region characterized by  $D_{\text{conf}}$  with a diameter of 50-300 nm according to the size of  
520 SNA clusters from STORM measurements (see also supplementary video 1). Confined regions were identified  
521 using the confinement index  $I_{\text{conf}}$  and the time the particle spends confined with  $I_{\text{conf}} >$  threshold was taken as  
522 the dwell time.  $D_{\text{conf}}$  was varied as shown in Fig. 2.

523

### 524 **Preparation of labelled lectins and antibodies**

525

526 Unconjugated *Sambucus nigra* agglutinin (SNA, VectorLabs) or anti-EGFR antibodies (Sigma) were diluted  
527 to 0.6 mg/ml in 100  $\mu\text{l}$  PBS (supplemented with 50 mM  $\text{NaHCO}_3$ ). AlexaFluor 647 NHS ester (Life  
528 Technologies) or Star Red NHS ester (Abberior) was added at a final concentration of (150  $\mu\text{M}$ ) and the  
529 solution was incubated for 30 min at room temperature. 100  $\mu\text{l}$  PBS were added and the solution was applied  
530 to a NAP5 size exclusion column (GE Healthcare) pre-equilibrated with PBS. 300  $\mu\text{l}$  fractions were collected  
531 in a 96-well plate and analyzed by ultraviolet - visible spectroscopy (Nanodrop2000, ThermoFisher). Peak

532 protein fractions were collected and the degree of labelling calculated. The labelled lectin and antibody  
533 fractions were stored at 4 °C until further use.

534

### 535 **SMLM sample preparation**

536

537 One day prior to the experiment,  $3 \times 10^5$  A549 cells were seeded on fibronectin-coated 25 mm round glass slides.  
538 For SNA imaging, the cells were washed in pre-warmed PBS and fixed for 10 min in freshly prepared 4 %  
539 paraformaldehyde (Alpha Aesar). The cells were blocked in blocking solution (5 % BSA in PBS) and incubated  
540 in 50 µg/ml SNA diluted in blocking buffer for 30 min. The cells were washed 3 times in PBS and post-fixed  
541 in freshly prepared 4 % paraformaldehyde for 10 min at RT. For EGFR labelling, the cells were washed, fixed  
542 and blocked as described above then incubated with anti-EGFR primary antibodies conjugated to Alexa 647.  
543 For two-color imaging, the cells were incubated with unconjugated primary anti-EGFR antibodies for 1h at  
544 RT. The cells were washed three times in PBS and further incubated with a solution of 5 µg/ml Alexa 750-  
545 conjugated secondary antibodies (goat anti-mouse, Life Technologies) and 5 µg/ml Alexa 647-conjugated  
546 SNA. The cells were washed 3 times in PBS and post-fixed in freshly prepared 4 % paraformaldehyde for 10  
547 min at RT. A549 cells in Fig. 1B were labelled with 10 ng/ml SNA-Alexa647 and 1µg/ml Hoechst33342 (Life  
548 Technologies) in DMEM.

549

### 550 **SMLM microscopy**

551

552 EGFR single- and two-color STORM imaging were performed using a recently developed flat-field epi  
553 illumination microscope [58]. Briefly, two lasers with wavelengths of 642 nm (2RU-VFL-P-2000-642-B1R,  
554 MPB Communications) and 750 nm (2RU-VFL-P-500-750-B1R, MPB Communications) were used to switch  
555 off fluorophores on the sample, while a 405 nm laser (OBIS, Coherent) controlled the return rate of the  
556 fluorophores to the fluorescence-emitting state. A custom dichroic (ZT405/561/642/750/850rpc, Chroma)  
557 reflected the laser light and transmitted fluorescence emission before and after passing through the objective  
558 (CFI60 PlanApo Lambda  $\lambda$ ~60/NA 1.4, Nikon). After passing the respective filter (ET700/75M, Chroma or  
559 ET810/90m, Chroma), emitted light from the sample was imaged onto the sCMOS camera (Zyla 4.2, Andor).  
560 Axial sample position was controlled using the pgFocus open hardware autofocus module

561 (<http://big.umassmed.edu/wiki/index.php/PgFocus>). Typically, 20,000 frames at 10 ms exposure time were  
562 recorded using Micromanager[59]. Imaging was performed using an optimized STORM buffer as described  
563 previously[60]. Image stacks were analyzed using a custom CMOS-adapted analysis routine[61]. Lateral  
564 sample drift was corrected using either image correlation (Thunderstorm[62]) or gold fiducial markers (B-  
565 Store, <https://github.com/kmdouglass/bstore>). Two-color datasets were analyzed using LAMA[63]. Random  
566 datasets for CBC analysis were generated in MatLab.

567

568 SNA single color imaging was performed on a modified Olympus IX71 inverted microscope. A 641 nm laser  
569 (Coherent, CUBE 640-100C) and a 405 nm laser (Coherent, CUBE 405-100C) was reflected by a multiband  
570 dichroic (89100 bs, Chroma) on the back aperture of a 100x 1.3 NA oil objective (Olympus, UplanFL) mounted  
571 on a piezo objective scanner (P-725 PIFOC, Physik Instrumente). The collected fluorescence was filtered using  
572 a band-pass emission filter (ET700/75, Chroma) and imaged onto an EMCCD camera (IxonEM+, Andor) with  
573 a 100 nm pixel size and using the conventional CCD amplifier at a frame rate of 25 fps. Laser intensity on the  
574 sample measured after the objective was 2 - 4 kW/cm<sup>2</sup>. 20,000 frames at 30 ms exposure time were recorded  
575 using Micromanager[59]. Image stacks were analyzed using ThunderStorm[62]. Lateral sample drift was  
576 corrected using either image correlation (Thunderstorm[62]) or gold fiducial markers (PeakSelektor, IDL,  
577 courtesy of Harald Hess).

578

579 PALM imaging was performed on a Zeiss Axio Observer D1 inverted microscope, equipped with a 100x, 1.49  
580 NA objective (Zeiss). Activation and excitation lasers with wavelengths 405 nm (Coherent cube) and 561 nm  
581 (Crystal laser) illuminated the sample in total internal fluorescence (TIRF) mode. We used a four color dichroic  
582 89100bs (Chroma), fluorescence emission was filtered with an emission filter ET605/70 (Chroma) and  
583 detected with an electron-multiplying CCD camera (iXon+, Andor Technology) with a resulting pixel size of  
584 160nm. For each region of interest, typically 10000 images of a 41x41 μm<sup>2</sup> area were collected with an  
585 exposure time of 30 ms. Photoactivatable proteins were activated with 405 nm laser intensity < 0.5 W/cm<sup>2</sup>,  
586 chosen to maintain a sparse population of activated molecules for localization, and excited with 561 nm laser  
587 intensity of ~1 kW/cm<sup>2</sup>. Image stacks were analyzed using ThunderStorm[62].

588

589 **STED microscopy**

590 STED measurements were done with Abberior STED microscope (Abberior Instruments, Germany) as  
591 previously described in [64,65]. The microscope is equipped with a titanium-sapphire STED laser (MaiTai  
592 HP, Spectra-Newport). The labelled Abberior Star Red- labelled SNA was excited using 640 nm pulsed  
593 diode laser (Picoquant, Germany) with an average excitation power of 5-10  $\mu$ W at the objective (UPlanSApo  
594 100x/1.4 oil, Olympus). Depletion was achieved using tunable pulsed laser at 780 nm. The microscope was  
595 operated using Abberior's Inspector software.

596

### 597 **Cluster analysis**

598

599 For the cluster analysis, we used the algorithm density-based spatial clustering applications with noise  
600 (DBSCAN)[66], which was embedded into our custom analysis MatLab routine. DBSCAN only needs two  
601 input parameters, *Eps* and *k*. It then counts for each localization, how many neighbor localization are within a  
602 circle of radius *Eps*. If the localization has *k* neighbors within *Eps*, it is classified as part of a cluster. If it does  
603 not have enough neighbors within *Eps*, but is itself a neighbor of a cluster localization, it is classified as an  
604 edge point. All remaining localization are classified as unclustered. In order to analyze the very dense and  
605 heterogeneous localization maps we obtained from SNA imaging, we performed two consecutive DBSCAN  
606 runs with different parameters for *Eps* and *k*. Only this allowed us to account for all visually visible clusters.  
607 Clustered and edge points are then combined and handed over to the single cluster analysis part of the analysis  
608 routine. For each cluster, we examined a set of parameters such as area and mean diameter as well as the  
609 number of localizations per cluster. We further analyzed the localization density distribution per cluster by  
610 performing a nearest-neighbor search using a search radius of 20 nm. All localization processing was  
611 performed using custom written MatLab (MathWorks) scripts.

612

### 613 **Single molecule calibration**

614

615 In order to measure the localization precision of our system and calibrate the grouping parameters, we  
616 performed STORM imaging on isolated dye molecules. 25 mm round glass slides (Menzel, # 1.5) were plasma  
617 cleaned for 10 min and coated with poly-L-lysine solution (100  $\mu$ g/ml in ddH<sub>2</sub>O) for 1 h at room temperature.  
618 After washing in ddH<sub>2</sub>O, the slides were dried and incubated with 10 - 50 pM dye-conjugated SNA or anti-

619 EGFR antibodies respectively. After 15 min, the slides were washed once and then imaged under experimental  
620 conditions. Localization maps were filtered and drift-corrected using gold fiducials. Individual localizations  
621 were first grouped with  $gap = 0$  and search radius 30 nm, to merge individual blink events, then grouped again  
622 with a gap time equal to the total acquisition time (15k frames). This allows to quantify the spread of  
623 localizations along x and y (i.e. the localization precision  $\sigma$ ) as well as the time between individual blink events  
624 (i.e. the dark time). All localization processing was performed using custom written MatLab (MathWorks)  
625 scripts.

626

### 627 **Virus binding simulations**

628

629 We simulated a flat patch of cell surface ( $1 \times 1 \mu\text{m}^2$ ) including  $n$  attachment factor molecules at random  
630 positions. For the analysis of the degree of clustering (Fig. S10B), the simulated molecules were gradually  
631 shifted into clusters, while  $n$  was kept constant. To analyze the impact of the cluster size (i.e. the number of  
632 receptors per cluster), we simulated a constant concentration of attachment factor molecules and added receptor  
633 clusters at the indicated size (Fig. S10A). A virus attempting to attach was simulated as a two-dimensional  
634 projection of a spherical 100 nm virus particle. The virus center was randomly placed onto the simulated  
635 surface and the number of attachment factor molecules within a radius of 50 nm was counted. More than 10  
636 molecules were counted as successful binding. Matlab scripts to run the simulation are available at GitHub  
637 ([https://github.com/christian-7/Virus\\_Binding\\_Simulation](https://github.com/christian-7/Virus_Binding_Simulation)).

638

### 639 **Acknowledgements**

640 We would like to thank Katharina Horst for support and Andreas Herrmann for helpful discussions  
641 on the manuscript.

642

643

644

645

646



## 647 **References**

- 648 1. Neumann G, Noda T, Kawaoka Y. Emergence and pandemic potential of swine-origin H1N1 influenza virus. *Nature*. Nature  
649 Publishing Group; 2009;459: 931–939. doi:10.1038/nature08157
- 650 2. Harris A, Cardone G, Winkler DC, Heymann JB, Brecher M, White JM, et al. Influenza virus pleiomorphy characterized by  
651 cryoelectron tomography. *Proc Natl Acad Sci U S A*. National Academy of Sciences; 2006;103: 19123–7.  
652 doi:10.1073/pnas.0607614103
- 653 3. Mair CM, Ludwig K, Herrmann A, Sieben C. Receptor binding and pH stability — How influenza A virus hemagglutinin  
654 affects host-specific virus infection. *Biochim Biophys Acta - Biomembr*. 2014;1838: 1153–1168.  
655 doi:10.1016/j.bbamem.2013.10.004
- 656 4. Sauter NK, Bednarski MD, Wurzburg BA, Hanson JE, Whitesides GM, Skehel JJ, et al. Hemagglutinins from two influenza  
657 virus variants bind to sialic acid derivatives with millimolar dissociation constants: a 500-MHz proton nuclear magnetic  
658 resonance study. *Biochemistry*. 1989;28: 8388–96. Available: <http://www.ncbi.nlm.nih.gov/pubmed/2605190>
- 659 5. Liu S-L, Zhang Z-L, Tian Z-Q, Zhao H-S, Liu H, Sun E-Z, et al. Effectively and Efficiently Dissecting the Infection of  
660 Influenza Virus by Quantum-Dot-Based Single-Particle Tracking. *ACS Nano*. 2012;6: 141–150. doi:10.1021/nn2031353
- 661 6. Lakadamyali M, Rust MJ, Babcock HP, Zhuang X. Visualizing infection of individual influenza viruses. *Proc Natl Acad Sci*  
662 *U S A*. 2003;100: 9280–5. doi:10.1073/pnas.0832269100
- 663 7. Rust MJ, Lakadamyali M, Zhang F, Zhuang X. Assembly of endocytic machinery around individual influenza viruses  
664 during viral entry. *Nat Struct Mol Biol*. 2004;11: 567–573. Available: <http://dx.doi.org/10.1038/nsmb769>
- 665 8. de Vries E, Tscherner DM, Wienholts MJ, Cobos-Jiménez V, Scholte F, García-Sastre A, et al. Dissection of the Influenza A  
666 Virus Endocytic Routes Reveals Macropinocytosis as an Alternative Entry Pathway. Pkosz A, editor. *PLoS Pathog*. Public  
667 Library of Science; 2011;7: e1001329. doi:10.1371/journal.ppat.1001329
- 668 9. Eierhoff T, Hrincius ER, Rescher U, Ludwig S, Ehrhardt C. The epidermal growth factor receptor (EGFR) promotes uptake  
669 of influenza A viruses (IAV) into host cells. *PLoS Pathog*. 2010;6: e1001099. doi:10.1371/journal.ppat.1001099
- 670 10. Schlessinger J. Ligand-Induced, Receptor-Mediated Dimerization and Activation of EGF Receptor. *Cell*. 2002;110: 669–  
671 672. doi:10.1016/S0092-8674(02)00966-2
- 672 11. Böttcher C, Ludwig K, Herrmann A, van Heel M, Stark H. Structure of influenza haemagglutinin at neutral and at fusogenic  
673 pH by electron cryo-microscopy. *FEBS Lett*. 1999;463: 255–259. doi:10.1016/S0014-5793(99)01475-1
- 674 12. Schermelleh L, Heintzmann R, Leonhardt H. A guide to super-resolution fluorescence microscopy. *J Cell Biol*. 2010;190:  
675 165–75. doi:10.1083/jcb.201002018
- 676 13. Liu Z, Lavis LD, Betzig E. Imaging Live-Cell Dynamics and Structure at the Single-Molecule Level. *Mol Cell*. Elsevier  
677 Inc.; 2015;58: 644–659. doi:10.1016/j.molcel.2015.02.033
- 678 14. Rust MJ, Bates M, Zhuang X. Sub-diffraction-limit imaging by stochastic optical reconstruction microscopy (STORM). *Nat*  
679 *Methods*. 2006;3: 793–5. doi:10.1038/nmeth929
- 680 15. Betzig E, Patterson GH, Sougrat R, Lindwasser OW, Olenych S, Bonifacino JS, et al. Imaging Intracellular Fluorescent  
681 Proteins at Nanometer Resolution. *Science (80- )*. 2006;313.

- 682 16. Hess ST, Girirajan TPK, Mason MD. Ultra-high resolution imaging by fluorescence photoactivation localization  
683 microscopy. *Biophys J. The Biophysical Society*; 2006;91: 4258–72. doi:10.1529/biophysj.106.091116
- 684 17. Hell SW, Wichmann J. Breaking the diffraction resolution limit by stimulated emission: stimulated-emission-depletion  
685 fluorescence microscopy. *Opt Lett. Optical Society of America*; 1994;19: 780. doi:10.1364/OL.19.000780
- 686 18. Chen J, Gao J, Wu J, Zhang M, Cai M, Xu H, et al. Revealing the carbohydrate pattern on a cell surface by super-resolution  
687 imaging. *Nanoscale. Royal Society of Chemistry*; 2015;7: 3373–3380. doi:10.1039/C4NR05970K
- 688 19. Berryman M, Franck Z, Bretscher A. Ezrin is concentrated in the apical microvilli of a wide variety of epithelial cells  
689 whereas moesin is found primarily in endothelial cells. *J Cell Sci.* 1993;1043: 1025–1043. Available:  
690 <http://jcs.biologists.org/content/105/4/1025.short>
- 691 20. Helenius A, Kartenbeck J, Simons K, Fries E. On the entry of semliki forest virus into BHK-21 cells. *J Cell Biol.* 1980;84.
- 692 21. Sauvaget C, Wayt J, Pelaseyed T, Bretscher A. Structure, Regulation, and Functional Diversity of Microvilli on the Apical  
693 Domain of Epithelial Cells. *Annu Rev Cell Dev Biol. Annual Reviews* ; 2015;31: 593–621. doi:10.1146/annurev-cellbio-  
694 100814-125234
- 695 22. Saxton MJ, Jacobson K. SINGLE-PARTICLE TRACKING: Applications to Membrane Dynamics. *Annu Rev Biophys*  
696 *Biomol Struct. Annual Reviews* 4139 El Camino Way, P.O. Box 10139, Palo Alto, CA 94303-0139, USA ; 1997;26: 373–  
697 399. doi:10.1146/annurev.biophys.26.1.373
- 698 23. Simson R, Sheets ED, Jacobson K. Detection of temporary lateral confinement of membrane proteins using single-particle  
699 tracking analysis. *Biophys J.* 1995;69: 989–993. doi:10.1016/S0006-3495(95)79972-6
- 700 24. Macia E, Ehrlich M, Massol R, Boucrot E, Brunner C, Kirchhausen T. Dynasore, a cell-permeable inhibitor of dynamin.  
701 *Dev Cell.* 2006;10: 839–50. doi:10.1016/j.devcel.2006.04.002
- 702 25. Dempsey GT, Vaughan JC, Chen KH, Bates M, Zhuang X. Evaluation of fluorophores for optimal performance in  
703 localization-based super-resolution imaging. *Nature Methods.* 2011. pp. 1027–1036. doi:10.1038/nmeth.1768
- 704 26. Yang S, Raymond-Stintz MA, Ying W, Zhang J, Lidke DS, Steinberg SL, et al. Mapping ErbB receptors on breast cancer  
705 cell membranes during signal transduction. *J Cell Sci.* 2007;120: 2763–2773. doi:10.1242/jcs.007658
- 706 27. Szabó Á, Szöllősi J, Nagy P. Co-clustering of ErbB1 and ErbB2 Revealed by FRET-Sensitized Acceptor Bleaching. *Biophys*  
707 *J.* 2010;99: 105–114. doi:10.1016/j.bpj.2010.03.061
- 708 28. Malkusch S, Endesfelder U, Mondry J, Gelléri M, Verveer PJ, Heilemann M. Coordinate-based colocalization analysis of  
709 single-molecule localization microscopy data. *Histochem Cell Biol.* 2012;137: 1–10. doi:10.1007/s00418-011-0880-5
- 710 29. Ariotti N, Liang H, Xu Y, Zhang Y, Yonekubo Y, Inder K, et al. Epidermal growth factor receptor activation remodels the  
711 plasma membrane lipid environment to induce nanocluster formation. *Mol Cell Biol.* 2010;30: 3795–804.  
712 doi:10.1128/MCB.01615-09
- 713 30. Wang Y, Gao J, Guo X, Tong T, Shi X, Li L, et al. Regulation of EGFR nanocluster formation by ionic protein-lipid  
714 interaction. *Cell Res. Shanghai Institutes for Biological Sciences, Chinese Academy of Sciences*; 2014;  
715 doi:10.1038/cr.2014.89
- 716 31. Zhang M, Chang H, Zhang Y, Yu J, Wu L, Ji W, et al. Rational design of true monomeric and bright photoactivatable

- 717 fluorescent proteins. *Nat Methods*. 2012;9: 727–729. doi:10.1038/nmeth.2021
- 718 32. Carter RE, Sorkin A. Endocytosis of functional epidermal growth factor receptor-green fluorescent protein chimera. *J Biol*  
719 *Chem. American Society for Biochemistry and Molecular Biology*; 1998;273: 35000–7. doi:10.1074/JBC.273.52.35000
- 720 33. Manley S, Gillette JM, Patterson GH, Shroff H, Hess HF, Betzig E, et al. High-density mapping of single-molecule  
721 trajectories with photoactivated localization microscopy. *Nat Methods*. 2008;5: 155–157. doi:10.1038/nmeth.1176
- 722 34. Cisse II, Izeddin I, Causse SZ, Boudarene L, Senecal A, Muresan L, et al. Polymerase II Clustering in. *Science (80- )*.  
723 2013;245: 664–667. doi:10.1126/science.1239053
- 724 35. Papp I, Sieben C, Sisson AL, Kostka J, Böttcher C, Ludwig K, et al. Inhibition of Influenza Virus Activity by Multivalent  
725 Glycoarchitectures with Matched Sizes. *ChemBioChem. WILEY-VCH Verlag*; 2011;12: 887–895.  
726 doi:10.1002/cbic.201000776
- 727 36. Papp I, Sieben C, Ludwig K, Roskamp M, Böttcher C, Schlecht S, et al. Inhibition of Influenza Virus Infection by  
728 Multivalent Sialic-Acid-Functionalized Gold Nanoparticles. *Small. WILEY-VCH Verlag*; 2010;6: 2900–2906.  
729 doi:10.1002/smll.201001349
- 730 37. Manzo C, Torreno-Pina J a., Joosten B, Reinieren-Beeren I, Gualda EJ, Loza-Alvarez P, et al. The neck region of the C-type  
731 lectin DC-SIGN regulates its surface spatiotemporal organization and virus-binding capacity on antigen-presenting cells. *J*  
732 *Biol Chem*. 2012;287: 38946–38955. doi:10.1074/jbc.M112.380121
- 733 38. Burckhardt CJ, Greber UF. Virus movements on the plasma membrane support infection and transmission between cells.  
734 *PLoS Pathogens*. 2009. doi:10.1371/journal.ppat.1000621
- 735 39. Casaletto JB, McClatchey AI. Spatial regulation of receptor tyrosine kinases in development and cancer. *Nat Rev Cancer*.  
736 Nature Publishing Group, a division of Macmillan Publishers Limited. All Rights Reserved.; 2012;12: 387–400.  
737 doi:10.1038/nrc3277
- 738 40. Abulrob A, Lu Z, Baumann E, Vobornik D, Taylor R, Stanimirovic D, et al. Nanoscale imaging of epidermal growth factor  
739 receptor clustering: Effects of inhibitors. *J Biol Chem*. 2010;285: 3145–3156. doi:10.1074/jbc.M109.073338
- 740 41. Nagy P, Jenei a, Kirsch a K, Szöllosi J, Damjanovich S, Jovin TM. Activation-dependent clustering of the erbB2 receptor  
741 tyrosine kinase detected by scanning near-field optical microscopy. *J Cell Sci*. 1999;112 ( Pt 1: 1733–41. Available:  
742 <http://www.ncbi.nlm.nih.gov/pubmed/10318765>
- 743 42. Szabó Á, Horváth G, Szöllösi J, Nagy P. Quantitative Characterization of the Large-Scale Association of ErbB1 and ErbB2  
744 by Flow Cytometric Homo-FRET Measurements. *Biophys J*. 2008;95: 2086–2096. doi:10.1529/biophysj.108.133371
- 745 43. Nagy P, Claus J, Jovin TM, Arndt-Jovin DJ. Distribution of resting and ligand-bound ErbB1 and ErbB2 receptor tyrosine  
746 kinases in living cells using number and brightness analysis. *Proc Natl Acad Sci U S A*. 2010;107: 16524–16529.  
747 doi:10.1073/pnas.1002642107
- 748 44. Lavi Y, Gov N, Edidin M, Gheber LA. Lifetime of major histocompatibility complex class-I membrane clusters is  
749 controlled by the actin cytoskeleton. *Biophys J. Biophysical Society*; 2012;102: 1543–1550. doi:10.1016/j.bpj.2012.01.042
- 750 45. Lavi Y, Edidin M a, Gheber L a. Dynamic patches of membrane proteins. *Biophys J. Elsevier*; 2007;93: L35-7.  
751 doi:10.1529/biophysj.107.111567

- 752 46. Garcia-Parajo MF, Cambi A, Torreno-Pina J a., Thompson N, Jacobson K. Nanoclustering as a dominant feature of plasma  
753 membrane organization. *J Cell Sci.* 2014;127: 4995–5005. doi:10.1242/jcs.146340
- 754 47. Schamel WWA, Arechaga I, Risueño RM, van Santen HM, Cabezas P, Risco C, et al. Coexistence of multivalent and  
755 monovalent TCRs explains high sensitivity and wide range of response. *J Exp Med.* 2005;202.
- 756 48. Lillemeier BF, Mörtelmaier MA, Forstner MB, Huppa JB, Groves JT, Davis MM. TCR and Lat are expressed on separate  
757 protein islands on T cell membranes and concatenate during activation. *Nat Immunol. Nature Research*; 2010;11: 90–96.  
758 doi:10.1038/ni.1832
- 759 49. Williamson DJ, Owen DM, Rossy J, Magenau A, Wehrmann M, Gooding JJ, et al. Pre-existing clusters of the adaptor Lat  
760 do not participate in early T cell signaling events. *Nat Immunol. Nature Publishing Group*; 2011;12: 655–662.  
761 doi:10.1038/ni.2049
- 762 50. Cambi A, Joosten B, Koopman M, de Lange F, Beeren I, Torensma R, et al. Organization of the integrin LFA-1 in  
763 nanoclusters regulates its activity. *Mol Biol Cell. American Society for Cell Biology*; 2006;17: 4270–81.  
764 doi:10.1091/mbc.E05-12-1098
- 765 51. Jaqaman K, Kuwata H, Touret N, Collins R, Trimble WS, Danuser G, et al. Cytoskeletal Control of CD36 Diffusion  
766 Promotes Its Receptor and Signaling Function. *Cell.* 2011;146: 593–606. doi:10.1016/j.cell.2011.06.049
- 767 52. Yang J, Reth M. Oligomeric organization of the B-cell antigen receptor on resting cells. *Nature. Nature Research*; 2010;467:  
768 465–469. doi:10.1038/nature09357
- 769 53. Gasparrini F, Feest C, Bruckbauer A, Mattila PK, Müller J, Nitschke L, et al. Nanoscale organization and dynamics of the  
770 siglec CD 22 cooperate with the cytoskeleton in restraining BCR signalling. 2015; 1–23.
- 771 54. Eisfeld AJ, Neumann G, Kawaoka Y. Influenza A virus isolation, culture and identification. *Nat Protoc. Nature Publishing*  
772 *Group*; 2014;9: 2663–2681. doi:10.1038/nprot.2014.180
- 773 55. Carpenter AE, Jones TR, Lamprecht MR, Clarke C, Kang I, Friman O, et al. CellProfiler: image analysis software for  
774 identifying and quantifying cell phenotypes. *Genome Biol. BioMed Central*; 2006;7: R100. doi:10.1186/gb-2006-7-10-r100
- 775 56. Sbalzarini IF, Koumoutsakos P. Feature point tracking and trajectory analysis for video imaging in cell biology. *J Struct*  
776 *Biol.* 2005;151: 182–195. doi:10.1016/j.jsb.2005.06.002
- 777 57. Tarantino N, Tinevez J-Y, Crowell EF, Boisson B, Henriques R, Mhlanga M, et al. TNF and IL-1 exhibit distinct ubiquitin  
778 requirements for inducing NEMO–IKK supramolecular structures. *J Cell Biol.* 2014;204.
- 779 58. Douglass KM, Sieben C, Archetti A, Lambert A, Manley S. Super-resolution imaging of multiple cells by optimized flat-  
780 field epi-illumination. *Nat Photonics. Nature Research*; 2016;10: 705–708. doi:10.1038/nphoton.2016.200
- 781 59. Edelstein A, Amodaj N, Hoover K, Vale R, Stuurman N, Edelstein A, et al. Computer Control of Microscopes Using  
782  $\mu$ Manager. *Current Protocols in Molecular Biology.* Hoboken, NJ, USA: John Wiley & Sons, Inc.; 2010. p. 14.20.1-  
783 14.20.17. doi:10.1002/0471142727.mb1420s92
- 784 60. Olivier N, Keller D, Gönczy P, Manley S. Resolution doubling in 3D-STORM imaging through improved buffers. *PLoS*  
785 *One. Public Library of Science*; 2013;8: e69004. doi:10.1371/journal.pone.0069004
- 786 61. Huang F, Hartwich TMP, Rivera-Molina FE, Lin Y, Duim WC, Long JJ, et al. Video-rate nanoscopy using sCMOS camera–

- 787 specific single-molecule localization algorithms. *Nat Methods. Nature Research*; 2013;10: 653–658.
- 788 doi:10.1038/nmeth.2488
- 789 62. Ovesný M, Křížek P, Borkovec J, Svindrych Z, Hagen GM. ThunderSTORM: a comprehensive ImageJ plug-in for PALM  
790 and STORM data analysis and super-resolution imaging. *Bioinformatics*. 2014;30: 2389–2390.  
791 doi:10.1093/bioinformatics/btu202
- 792 63. Malkusch S, Heilemann M, Hensel M, Klingauf J, Piehler J, Müller B, et al. Extracting quantitative information from single-  
793 molecule super-resolution imaging data with LAMA – LocAlization Microscopy Analyzer. *Sci Rep. Nature Publishing*  
794 *Group*; 2016;6: 34486. doi:10.1038/srep34486
- 795 64. Galiani S, Waithe D, Reglinski K, Cruz-Zaragoza LD, Garcia E, Clausen MP, et al. Super-resolution Microscopy Reveals  
796 Compartmentalization of Peroxisomal Membrane Proteins. *J Biol Chem. American Society for Biochemistry and Molecular*  
797 *Biology*; 2016;291: 16948–62. doi:10.1074/jbc.M116.734038
- 798 65. Clausen MP, Galiani S, Serna JB de la, Fritzsche M, Chojnacki J, Gehmlich K, et al. Pathways to optical STED microscopy.  
799 *NanoBioImaging. De Gruyter Open*; 2014;1. doi:10.2478/nbi-2013-0001
- 800 66. Ester M, Ester M, Kriegel H-P, Sander J, Xu X. A density-based algorithm for discovering clusters in large spatial databases  
801 with noise. *Proc 2nd Internat Conf Knowl Discov Data Min*. 1996; 226--231. Available:  
802 <http://citeseerx.ist.psu.edu/viewdoc/summary?doi=10.1.1.121.9220>
- 803
- 804
- 805
- 806
- 807
- 808
- 809
- 810
- 811
- 812
- 813
- 814
- 815
- 816
- 817

## 818 **Figure Legends**

819

### 820 **Figure 1: Sialic-acid containing IAV attachment factors are organized in nanodomains on A549 cells.**

821 (A) Influenza virus is an enveloped particle that encapsulates the segmented (-)vRNA genome built of 8 viral  
822 ribonucleoprotein particles (vRNPs). The viral membrane harbors the two glycoproteins hemagglutinin (HA)  
823 and neuraminidase (NA). HA is responsible for binding sialic acid (SA) containing attachment factors on the  
824 host cell plasma membrane. Upon cell-binding, the virus needs to activate functional receptors to trigger  
825 endocytosis. (B) Confocal imaging of live A549 cells labelled with SNA and Hoechst (DNA) feature a non-  
826 uniform SNA distribution across the plasma membrane. Large finger-like protrusions can be observed on the  
827 apical plasma membrane. (C) Confocal and STED live-cell imaging of A549 cells labelled with SNA confirms  
828 the existence of finger-like protrusions as well as a population of smaller nanodomains with diameter of ~100  
829 nm (C, right, inset). (D) Further, we utilized STORM imaging of A549 cells labelled with SNA. Reconstructed  
830 STORM images confirm two major structural features (1) finger-like protrusions as well as (2) small  
831 nanodomains. Cell treatment with neuraminidase (NA, 0.01 U/ml for 2h) led to a strong reduction of the  
832 localization density due to the cleavage and hence decrease local concentration of SA (D, right, inset).

833

### 834 **Figure 2: Density-based localization analysis reveals small SA clusters between microvilli.**

835 (A) Spatial distribution of STORM localizations from SNA-A647 on A549 cells showing the coexistence of two structural  
836 features, (1) large microvilli as well as (2) small nanodomains. The inset in A shows a rendered reconstruction  
837 (10 nm/pxl) of the localization map in A. (B) Density distribution of localizations shown in A within a search  
838 radius of 50 nm. Color scale according to number of neighbor localizations. (C) Final cluster identification  
839 with identified clusters in random color code. (D) Distribution of cluster area. The cluster identification allows  
840 quantification of the cluster area. After all identified clusters were filtered according to their size to selectively  
841 analyze non-microvilli structures, we found clusters with an area between  $0.5 - 4 * 10^4 \text{ nm}^2$ . Distribution of  
842 the number of molecules per cluster as estimated according to the number of localizations (D, inset).

843

### 844 **Figure 3: Small SNA clusters have an inner density gradient of localizations decreasing from the dense**

845 **core to the cluster periphery.** The inner structure of non-microvilli clusters was analyzed according to their  
846 local localization density. (A) Representative example of a membrane patch with identified clusters showing

847 the inner density gradient. The color code represents the number of nearest neighbor localizations within a  
848 radius of 30 nm (i.e. the local localization density). **(B)** 3D plot of the two clusters boxed in **A**. The localization  
849 density is plotted on the vertical axis. **(C)** Distribution of the density difference between background and the  
850 cluster center over all identified clusters.

851

852 **Figure 4: IAV performs a receptor concentration-driven random walk on the plasma membrane.** Based  
853 on our quantitative analysis of the AF distribution on A549 cells, we hypothesize a motion behavior that is  
854 driven by the local AF concentration. We simulate this behavior initially as a 2D random walk with free  
855 diffusion coefficient  $D_{\text{free}}$  **(A)**. **(B)** Next, we simulate AF clusters (red circles,  $r = 100$  nm), which would due  
856 to the increased SA concentration lead to a temporal confinement ( $D_{\text{conf}} < D_{\text{free}}$ ). To identify confined regions  
857 within the simulated virus trajectories, we establish a confinement index  $I_{\text{conf}}$ . Accordingly, a free diffusing  
858 particle shows only fluctuation in of  $I_{\text{conf}}$  **(D)**, while the addition of temporal confinement leads to a clear  
859 increase that overlaps with stationary phases of the particle as visible in the XY displacement plot **(E)**. We  
860 used the confinement probability to analyze experimental virus trajectories in particular the mixed type of  
861 trajectories **(C)** (see also Fig. S5) **(C)**.  $I_{\text{conf}}$  shows a clear signature of temporal confinement **(F)** similar to the  
862 model prediction **(E)**. As a further challenge for our model, we performed a subtrajectory analysis, thereby  
863 extracting the dwell time,  $D_{\text{conf}}$  as well as the area of the respective temporal confinement in our virus  
864 trajectories. **(G)** shows an overlay of the perimeters of the extracted confined regions as well as the average  
865 radius **(R)**. From our simulated data, correlation of  $D_{\text{conf}}$  with the dwell time shows that a local increase in AF  
866 concentration (i.e. decreased diffusion) due to the encounter of an SA nanodomain leads to an increased local  
867 dwell time **(H)**, red markers). We observed a similar behavior, when we tested the confinement dwell time in  
868 experimental virus trajectories **(H)**, black markers).

869

870 **Figure 5: EGFR is organized in nanodomains that overlap with SNA domains.** **(A)** A549 cells were  
871 labelled with antibodies against EGFR. STORM imaging revealed a clustered organization of EGFR on the  
872 apical plasma membrane. The clusters have an average diameter of 60 nm and contain about 5 - 10 molecules  
873 **(B)**. Scale bar 1  $\mu\text{m}$ . Inset: 100 nm. **(C)** Two-color STORM imaging of A549 cells labelled with SNA and  
874 anti-EGFR antibodies. The two panels on the right show larger magnification of the boxed areas in the left  
875 panel. Scale bars: 500 nm (left panel), 200 nm (right panel). The degree of colocalization was quantified using

876 coordinate-based colocalization, where each localization is associated with a colocalization value  $C_A$ . **(D)** Box  
877 plots of  $C_A$  distribution of SNA localizations when colocalized with (1) SNA, (2) a random distribution of  
878 localizations at equal density as EGFR and (3) EGFR. After stimulating the cells, we found that phosphorylated  
879 EGFR (Y1068) is also localized in nanodomains, suggesting activation of pre-formed cluster. Although a small  
880 population of clusters seems to be phosphorylated without stimulus, we observed an increase in the activated  
881 cluster population after stimulation with IAV or EGF **(E, lower panel)**. To test for a potential redistribution of  
882 EGFR, we looked at the entire population after stimulation. While after EGF stimulation, we could observe a  
883 reduction of the clustered protein fraction as well as the cluster density per area, we could not detect such a  
884 protein redistribution after IAV stimulation **(F)**.

885

886 **Figure 6: Live-cell super-resolution imaging reveals long-lived EGFR clusters in living cells.** EGFR  
887 coupled to the photo-convertible protein mEos3 was expressed in A549 cells. Subsequent PALM imaging  
888 allows to study EGFR distribution in live cells at the single protein level. In the absence of any stimulus, we  
889 could detect nanodomains of EGFR within the apical and also the basolateral plasma membrane **(A)**. Scale  
890 bar: left panel, 1  $\mu\text{m}$ . The image in **A** shows a maximum projected map of single molecule localizations  
891 recorded over a period of 10 min. **B** shows two cluster examples as a cumulative density distribution (upper  
892 panel) as well as XY scatter with the colorscale according to time at which the localization was detected (lower  
893 panel). While the projection of all localization allows to identify protein clusters, we can use the time  
894 information to further estimate the cluster lifetime. As shown in **C**, cumulative counting of individual  
895 localizations within a clustered region gives direct information of the minimum cluster lifetime. **D** shows the  
896 corresponding lifetime distribution of EGFR clusters recorded at the apical as well as the basolateral membrane  
897 in the absence of any stimulus.

898

899 **Figure 7: Model for IAV-mediated cell binding, receptor search and activation.** Using quantitative  
900 STORM imaging, we could show that SA-conjugated IAV AF as well as one functional receptor, EGFR, form  
901 nanodomains in the plasma membrane of A549 cells. While dense AF nanodomains constitute an attractive  
902 multivalent binding platform, their diversity in local AF concentration suggests a variety of different residence  
903 times for which IAV would stay bound within these domains. Using single-virus tracking, we observed a  
904 mixed diffusive - confined motion, that could be simulated using our quantitative SA cluster information.



905 These data suggest a receptor concentration-driven lateral search mechanism between SA enriched  
906 nanodomains. Eventually, since AF domains partly overlap with EGFR, IAV encounters a functional receptor  
907 that can be activated to signal cell entry. Our data further suggest that a stable preformed EGFR cluster  
908 population is activated during IAV stimulation, thereby possibly facilitating efficient signal transduction.  
909 EGFR clusters are stabilized by lipid rafts as well as cortical actin.

910

911

## 912 **Supporting Information**

913

### 914 **Supplementary note 1:**

915

#### 916 **Establishment of the experimental system**

917 It was shown previously that influenza A virus (IAV) activates and uses EGFR to trigger endocytosis and enter  
918 into mammalian host cells [9]. Specifically, this was shown for different virus strains including H1N1/PR8,  
919 H7N1/FPV and H3N2/X31. To test if IAV H3N2/X31 in our hands entered cells in an EGFR-mediated way,  
920 we stimulated human A549 cells with 100 ng/ml EGF, causing EGFR internalization and thereby removal  
921 from the cell surface [9]. We found that successful virus infection, as detected by viral nucleoprotein  
922 production, was decreased by 40 % as compared to the control. As expected, the effect of completely removing  
923 the primary AF sialic acid using sialidase (neuraminidase, NA) treatment was much stronger and reduced the  
924 amount of infected cells by 80 % (Fig. S1).

925

#### 926 **S1 Figure: IAV infection efficiency in A549 cells is reduced after EGF stimulation or NA treatment.**

927 A549 cells were either treated with 100 ng/ml EGF for 30 min to reduce the concentration of available EGF  
928 receptors or 0.01U/ml neuraminidase for 3h at 37 °C. Cells were infected with influenza A/X31 (MOI ~ 1) for  
929 5h then fixed and immunolabelled for newly produced viral nucleoprotein (NP). The cell nuclei were  
930 counterstained with DAPI. Nuclear NP signal was quantified using automated image analysis with Cellprofiler  
931 [55].

932

933 **S2 Figure: Ezrin labelling and microvilli identification in STORM localization maps.** (A) A549 cells  
934 were immunolabelled for the actin-binding protein Ezrin, which was shown to be enriched in microvilli [19].  
935 The cells were imaged using STORM. Microvilli are clearly distinguishable and resemble the large cluster  
936 population observed in SNA labelled cells as well as observations from scanning electron microscopy (SEM,  
937 inset). Scale bars: left panel: 2  $\mu\text{m}$ , right panel: 500 nm, inset: 200nm. (B) Ezrin localization maps can be used  
938 to set a threshold for the clusters size obtained from DBSCAN clustering to specifically analyze the not-  
939 microvilli cluster population in SNA localization maps (Fig. 2).

940  
941 **S3 Figure: Experimentally obtained localization precision  $\sigma$  for Alexa 647 and Alexa 750.** Glass slides  
942 were washed, plasma cleaned and coated with Poly-L-lysine (0.01 % in water) for 1h. Conjugated antibodies  
943 were diluted in PBS to a final concentration of  $\sim 10$  nM and adsorbed to the coated glass slides. Individual  
944 molecules were imaged under experimental conditions. Localizations originating from single Alexa 647 (A)  
945 and Alexa 750 (B) molecules were aligned to allow the estimation of the average localization precision:  $\sigma_{x,y}$   
946  $A_{647} = 12$  nm and  $\sigma_{x,y} A_{750} = 21$  nm.

947  
948 **S4 Figure: Localization precision partly mimics local concentration gradient.** To test if the localization  
949 precision accounts for the gradient in localization density we observed in AF clusters (Fig. 3), we simulated  
950 clusters of random localizations (A) using cluster size data taken from our experimental STORM  
951 measurements (i.e. radius  $r$ , number of localizations  $n$ , localization precision  $\sigma$ ). The local density was then  
952 determined using a nearest neighbor search within a radius of  $3\sigma$ . We indeed observed that the simulated  
953 clusters exhibit an up to about 8-fold local enrichment (see one example in A-C). We then simulated clusters  
954 following the full distribution of experimental data (i.e. radius  $r$ , number of localizations  $n$ ). Comparing with  
955 the density gradient observed in our experimental data (D and Fig.3), we find that both distributions are well  
956 separated and that the described effect only accounts for density changes  $< 8$ -fold.

957  
958 **S5 Figure: IAV single-virus tracking on A549 cells.** Single virus tracking on live A549 cells revealed four  
959 main types of virus movement: (A) three-stage movement, (B) confined, (C) mixed, (D) drift. The fraction of  
960 all modes of movement was analyzed at the indicated conditions (E).

961

962 **S6 Figure: Molecule blinking correction for EGFR data.** To estimate the number of emitting molecules  
963 from a STORM dataset and to avoid false clustering of individual molecules, we merged multiple localizations  
964 originating from the same molecule into a single localization. The merging procedure requires a gap distance  
965 as well as a gap time, within which localizations will be counted as originating from the same molecule. To  
966 calibrate these values, we imaged isolated labelled anti-EGFR antibodies under experimental conditions.  
967 Localizations originating from a single molecule could be grouped to determine their lateral spread (**A**) as well  
968 as the dark time between individual bursts (**B**). To ensure a high certainty of merging, the dark time cut-off  
969 was determined by the 99 % quantile to 18 s. Using the experimentally determined spread of localization (**A**,  
970 35 nm) and the dark-time cut off, localization bursts from the same molecule can now be combined into a  
971 single position. While each molecule is counted multiple times due to molecule blinking (uncorrected, **C**),  
972 merging allows a more precise estimate of the molecule numbers while avoiding false clustering (corrected,  
973 **D**).

974

975 **S7 Figure: Experimental positive control for CBC-based colocalization analysis.** We used two differently  
976 labelled versions of SNA as an experimental colocalization positive control. This served us also as a nominator  
977 to better evaluate the degree of colocalization of our test molecule pair SNA/EGFR. A549 cells were labelled  
978 with two SNA variants, conjugated to Alexa 647 as well Alexa 555 (**A**). Both localization datasets were  
979 analyzed using CBC resulting in a colocalization value  $C_A$  associated to each individual molecule. A histogram  
980 of  $C_A$  for one channel is shown in **B**. We set the threshold to 0.3, above which localizations were counted as  
981 colocalized. **C** shows one SNA dataset color coded according to  $C_A$ . **D** shows all localizations from the same  
982 dataset with  $C_A > 0.3$ .

983

984 **S8 Figure: EGFR cluster size and molecule number after IAV and EGF stimulation.** A549 were either  
985 left in culture medium (control) or stimulated with IAV or 100 ng/ml EGF for 15 min. The cells were fixed  
986 and immunostained using anti-EGFR antibodies. Upon either stimulation, we could not detect a change in the  
987 size of the EGFR clusters (**A**) or the amount of molecules per cluster (**B**). **B**, legend as in **A**.

988

989 **S9 Figure: Single molecule diffusion coefficients from sptPALM of EGFR-mEos3 in A549 cells.** A549  
990 cells were transiently transfected with EGFR-mEos3. sptPALM imaging and analysis of single molecule

991 trajectories revealed a wide range of diffusion coefficients. The left panels in **A** and **B** show the distribution of  
992 diffusion coefficients from sptPALM obtained at the apical (**A**) and the basolateral plasma membrane (**B**).  
993 Molecules were classified as mobile ( $D > 0.5 \mu\text{m}^2/\text{s}$ ) or immobile ( $D < 0.5 \mu\text{m}^2/\text{s}$ ) respectively. Calculated MDS  
994 plots (**A** and **B**, right panels) for both classes exhibit a rather linear dependence for the mobile fraction, while  
995 the curve saturates with increasing lag time for the immobile fraction, the latter indicating spatial confinement.  
996

997 **S10 Figure: Virus Binding Simulation.** To estimate the effect of AF clustering on the efficiency of a virus  
998 to bind the target cell, we simulated two scenarios in a  $1 \times 1 \mu\text{m}$  membrane area, (**A**) a varying cluster size and  
999 (**B**) a varying degree of clustering. For **A**, we simulated a constant lateral concentration of AF (black) and  
1000 added AF clusters (blue) at increasing size. In **B**, we keep the total amount of AF constant and gradually shift  
1001 molecules into clusters. In both cases, an approaching virus was simulated as a 2D projection of a small  
1002 spherical IAV particle (contact area as red circles in **A** and **B**). A binding attempt was counted as successful if  
1003 at least 10 AF molecules were found inside the contact area. **C** and **D** show the simulation result plotted as the  
1004 binding probability out of 1000 simulations against the respective tested cluster parameter.

1005  
1006 **S11 Figure: EGFR activation upon SNA binding and pharmacological EGFR cluster disruption in A549**  
1007 **cells.** (**A**) We wanted to test if SNA (tetramer), which has a lower binding valency against sialic acid compared  
1008 to IAV, is still able to activate EGFR in A549 cells. To this end, cells were either stimulated with EGF or  
1009 incubated with DMEM supplemented with  $50 \mu\text{g}/\text{ml}$  unlabelled SNA. To diminish the SNA-SA interaction,  
1010 we also treated the cells with  $0.1 \text{ units}/\text{ml}$  sialidase for 90 min before SNA stimulation. The cells were fixed  
1011 and immunolabelled using antibodies against phospho-EGFR (Y1068). Although, we detected an increase in  
1012 the phospho-EGFR cluster density upon EGF stimulation, we did not detect a difference after incubation with  
1013 SNA. (**B**) The stability of EGFR clusters was tested upon pharmacological cell treatment either to inhibit actin  
1014 polymerization using latrunculin A ( $0.2 \mu\text{M}$  for 30 min) or cholesterol depletion using methyl- $\beta$ -cyclodextrin  
1015 ( $40 \mu\text{g}$  for 60 min). After the treatment, the cells were fixed and immunolabelled using antibodies against  
1016 EGFR. Following both treatment, we detected a decrease in the clustered fraction suggesting cluster  
1017 destabilization.

1018

1019 **S1 Video: Evolution of the confinement index  $I_{\text{conf}}$  as well as the particles distance from the origin for a**  
1020 **simulated virus trajectory.** The particle moves according to  $D_{\text{free}}$  until it encounters an AF cluster (top panel,  
1021 red circles). Due to the higher concentration of AF, the particles diffusion is slowed down to  $D_{\text{conf}}$  and the  
1022 particle is confined. Particle confinement is detected by an increase of the confinement index (middle panel)  
1023 as well as a plateau in the distance from origin plot (lower panel).

## Figure 1

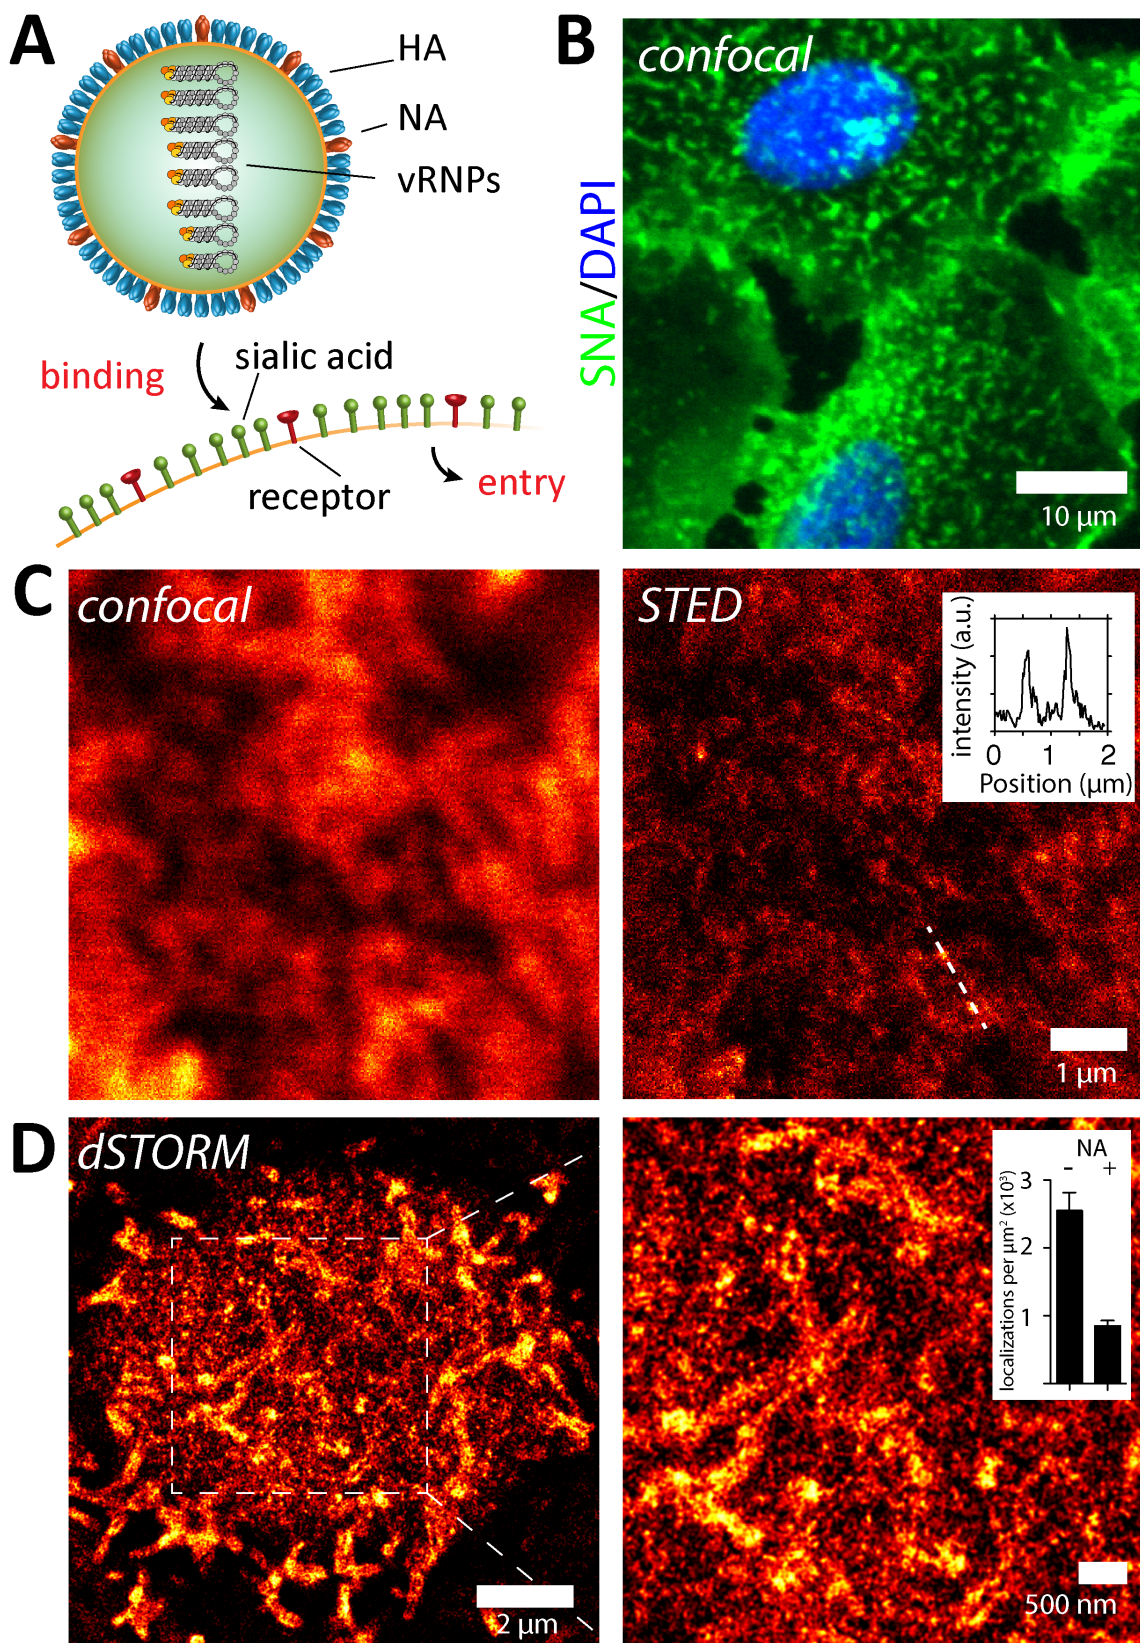

## Figure 2

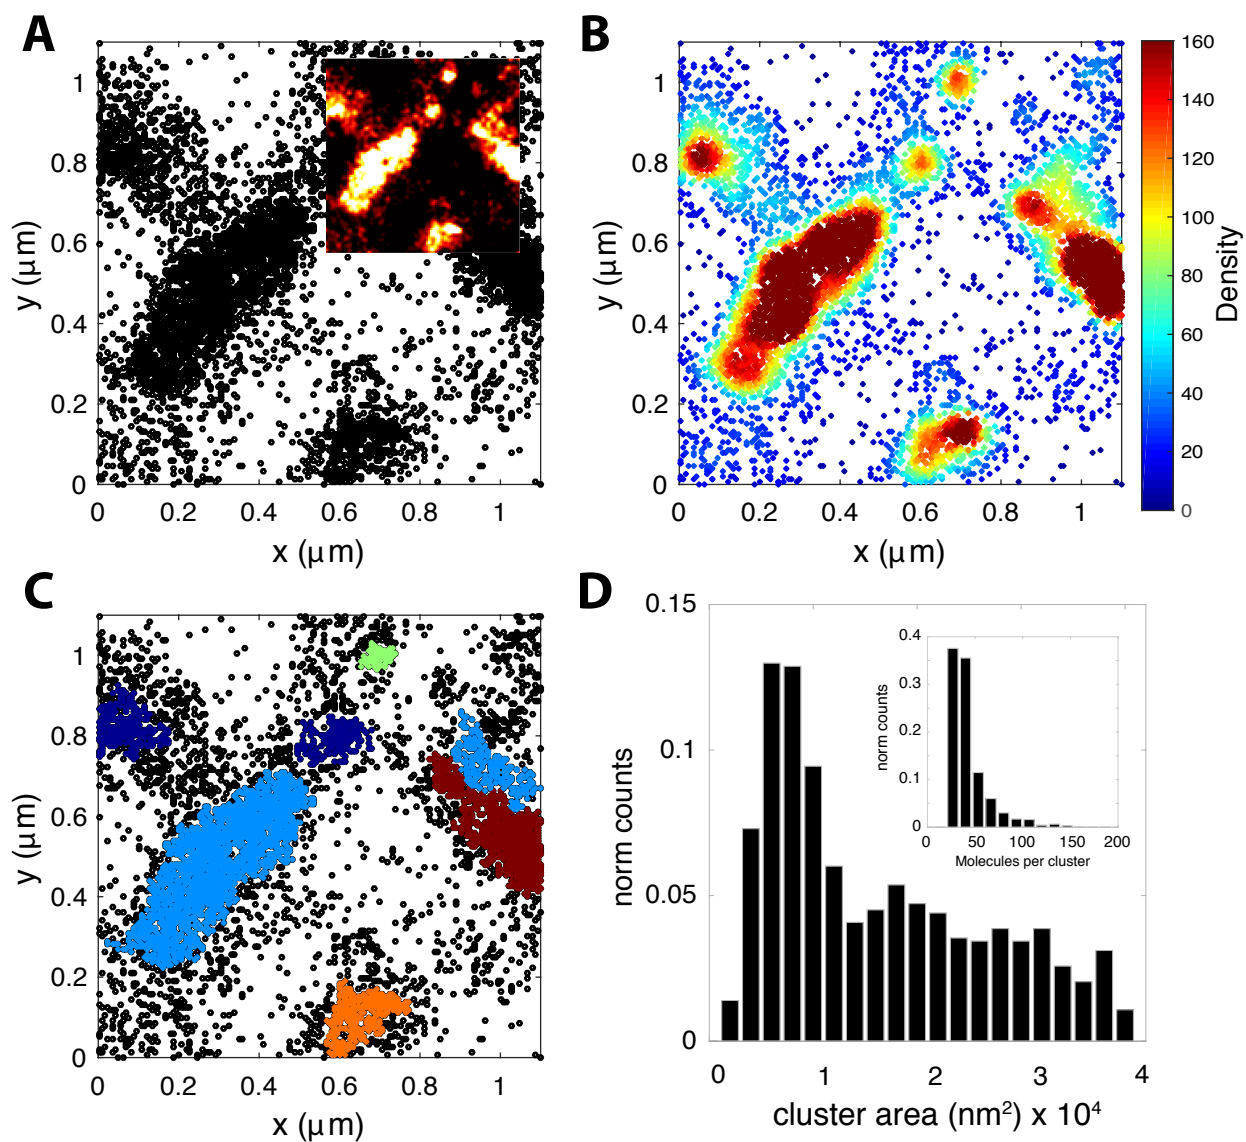

## Figure 3

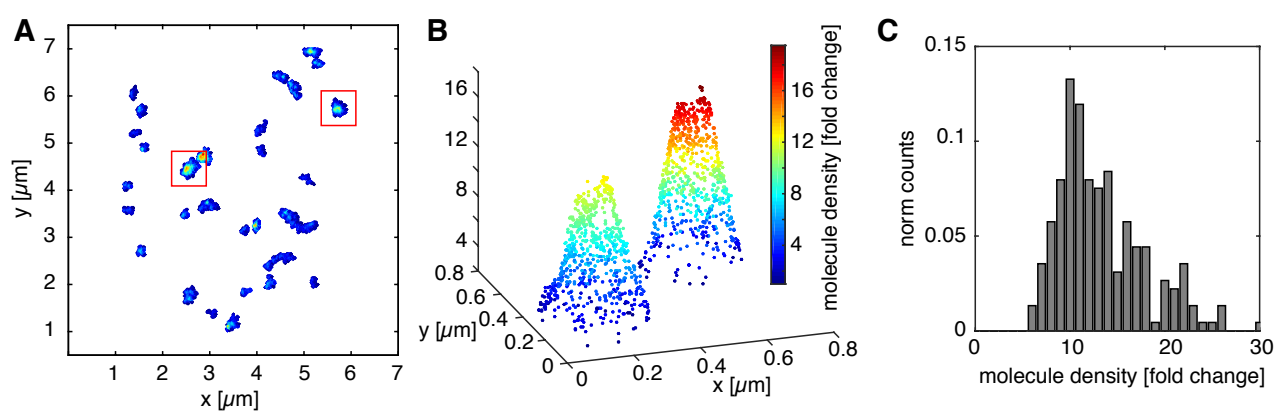



## Figure 4

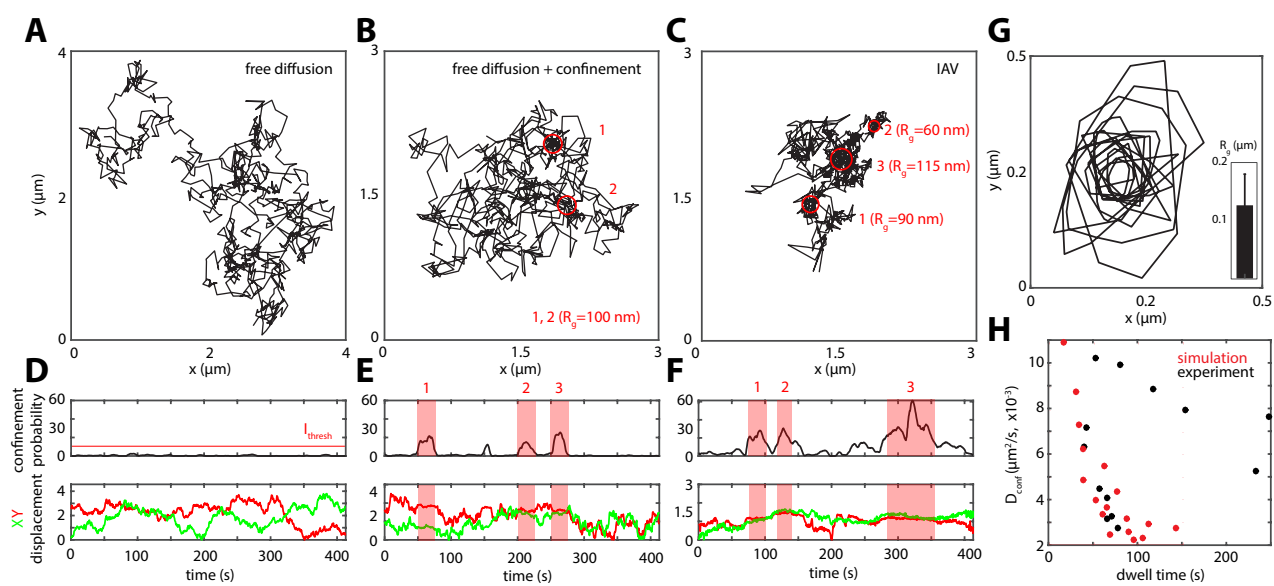

## Figure 5

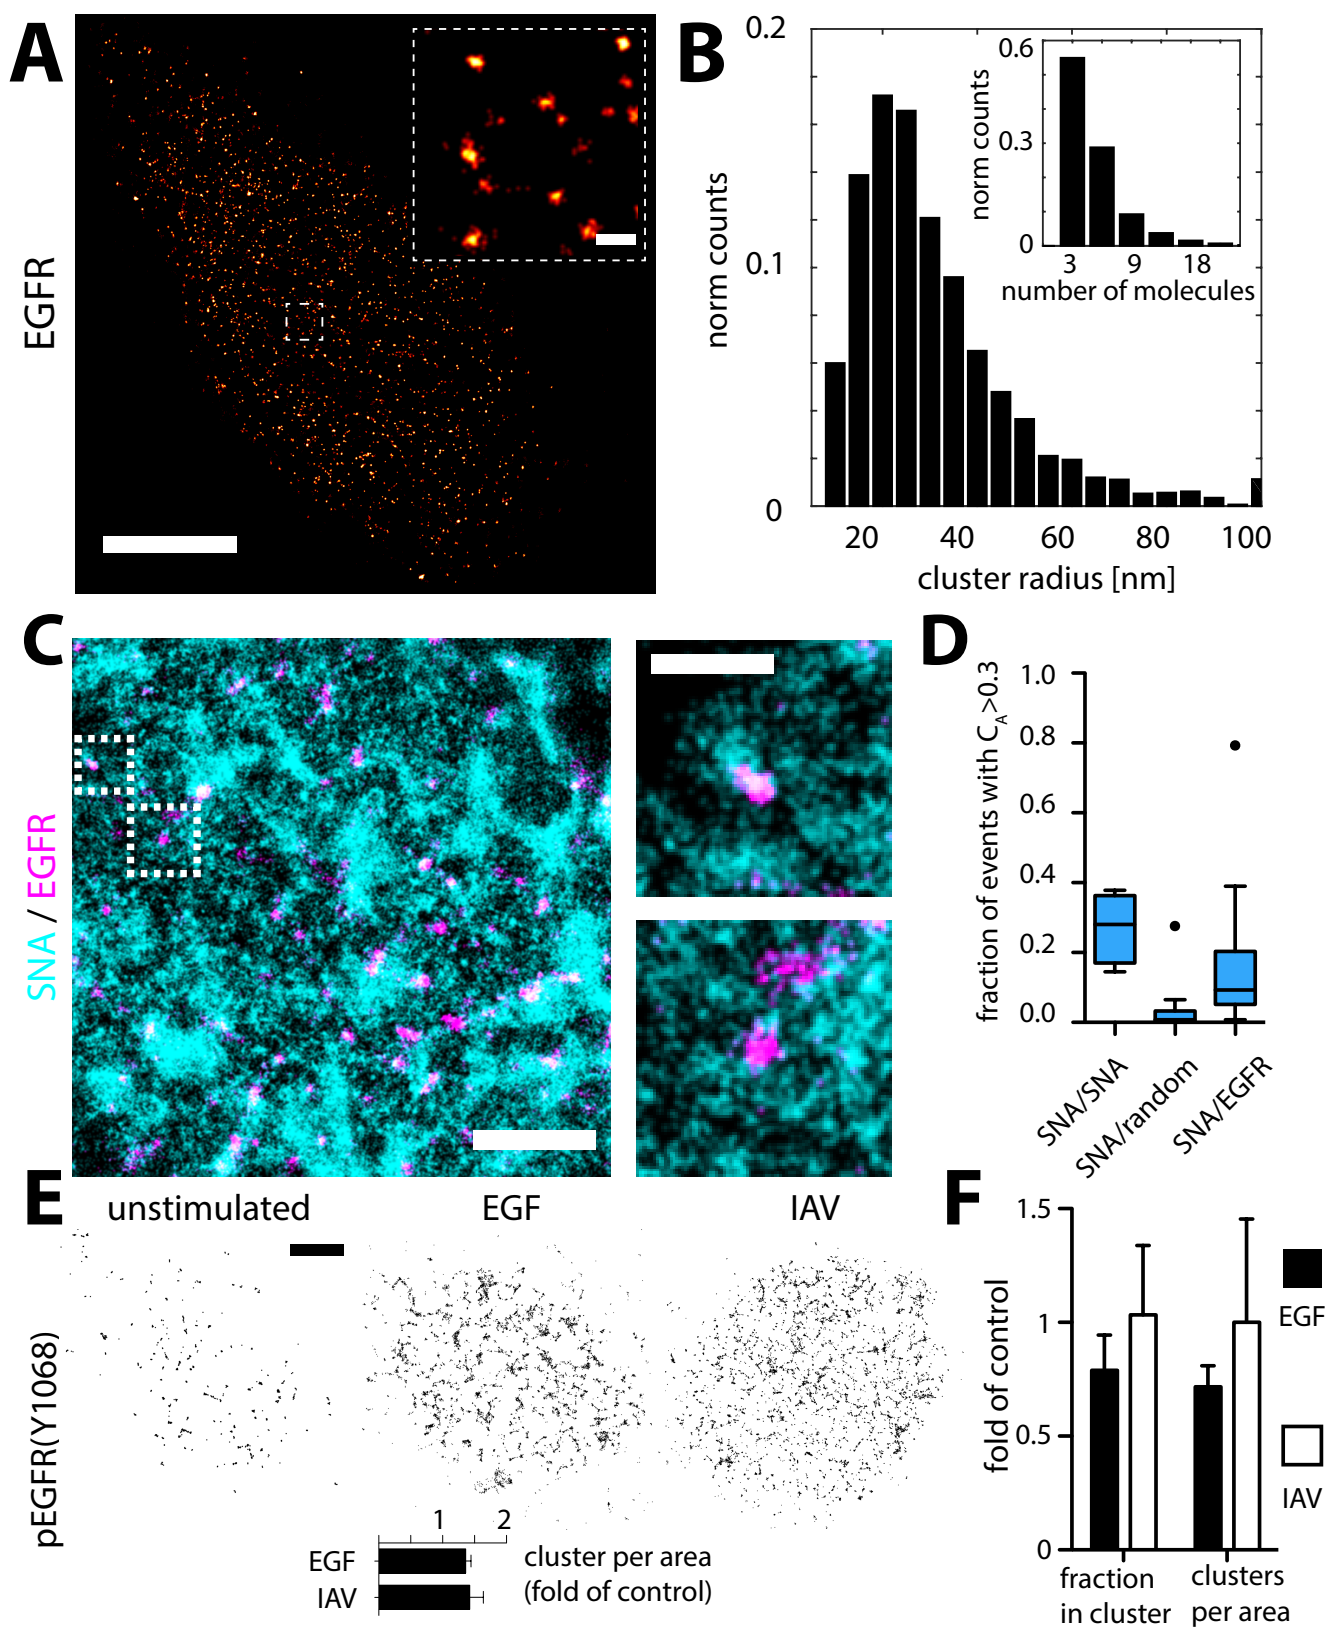

Figure 6

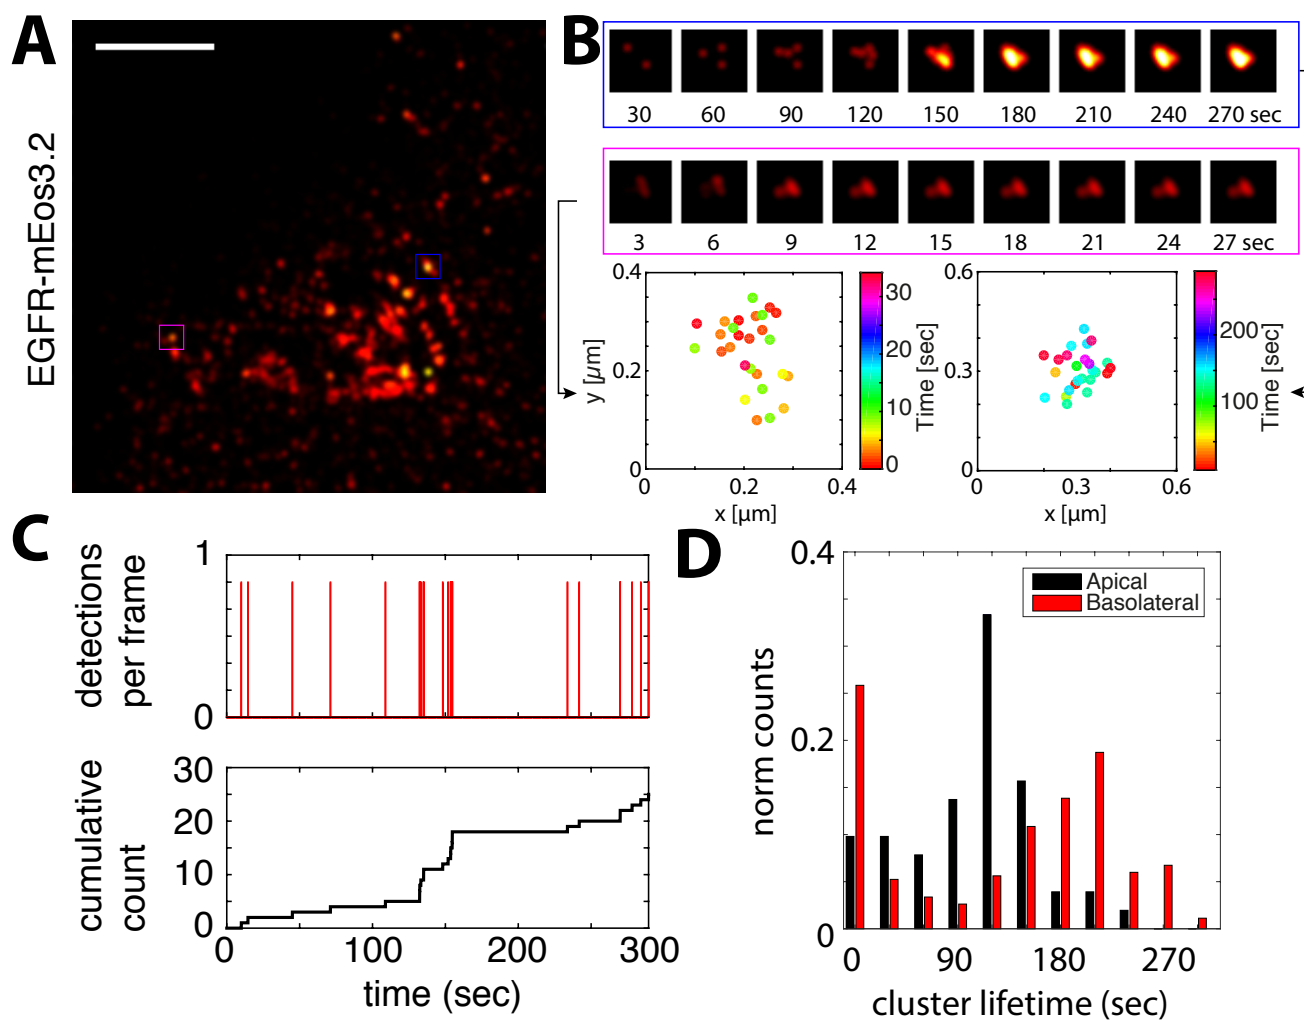

## Figure 7

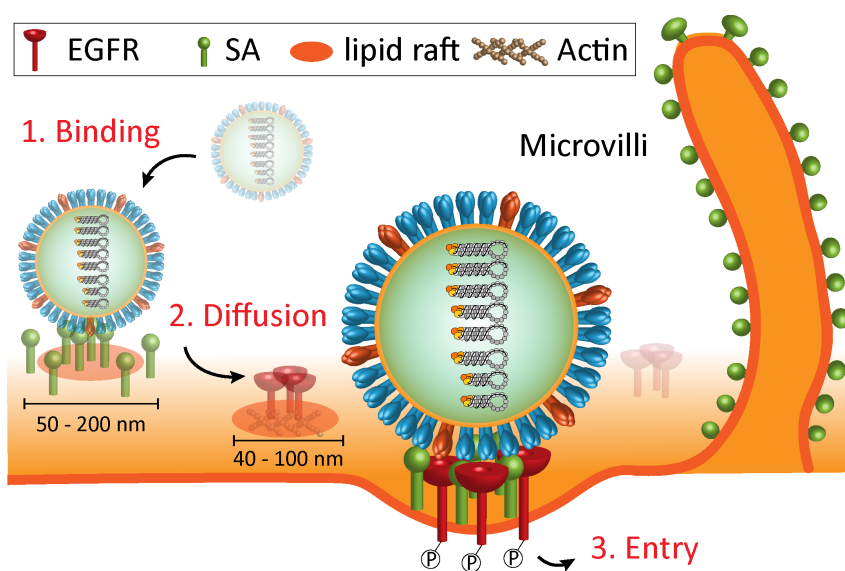

Source: http://biorxiv.org/content/10.1101/264713v1.full.pdf
